# Supplementary material
Source: PubMed Central journal article supplement (PMC6993105)
Supplement: mmc5.pdf [file mmc5.pdf]

final\_allometric.ct1

;Model Desc: base allometry. age and temp

;Project Name: phnresubmit

\$PROB RUN# 6003

\$INPUT C ID Site TIME CPBT AMT RATE DV EVID WT PRIM CO AGE CUF MUFON MUF COAT CPBTOT  
TEMP

\$DATA PK10.CSV IGNORE=C

\$SUBROUTINES ADVAN3 TRANS4

\$PK

IF (TIME.GT.CPBT) THEN

TVCL=THETA(1)\*((WT/70)\*\*(0.75))\*(AGE/(THETA(9)+AGE))

CL=(TVCL)\*EXP(ETA(1))

ELSE

TVCL=THETA(2)\*((WT/70)\*\*(0.75))

CL=(TVCL)\*EXP(ETA(2))

ENDIF

IF (TIME.GT.CPBT) THEN

TVV1=THETA(3)\*(WT/70)

V1=(TVV1)\*EXP(ETA(3))

ELSE

TVV1=THETA(4)\*((WT/70))\*((TEMP/37)\*\*THETA(10))

V1=(TVV1)\*EXP(ETA(4))

ENDIF

IF (TIME.GT.CPBT) THEN

TVQ=THETA(5)\*(WT/70)\*\*(0.75)

Q=(TVQ)\*EXP(ETA(7))

ELSE

TVQ=THETA(6)\*(WT/70)\*\*(0.75)

Q=(TVQ)\*EXP(ETA(8))

ENDIF

IF (TIME.GT.CPBT) THEN

TVV2=THETA(7)\*(WT/70)

V2=(TVV2)\*EXP(ETA(6))

ELSE

TVV2=THETA(8)\*((WT/70))

V2=(TVV2)\*EXP(ETA(5))

ENDIF

S1=V1/1000

\$ERROR

Y = F + F\*ERR(1)+ERR(2)

IPRE=F

final\_allometric.ct1

\$THETA

(0.0,6.31130E-01) ;[1-CL POST OP]  
(0.0,1.23821E-02) ;[CPB CL]  
(0.0,1.69133E+02) ;[V1 POST OP]  
(0.0,1.32323E+02) ;[CPB V1]  
(0.0,1.36028E-01) ;[Q POST OP]  
(0.0,2.93710E+00) ;[Q CPB]  
(0.0,8.52377E+01) ;[V2 POST OP]  
(0.0,1.76032E+02) ;[CPB V2]  
(0.0,1.40969E+00) ;[AGE]  
(-10.0,-1.83344E+00) ;[TEMP CPBV1]

\$OMEGA BLOCK(4)

2.19106E-01 ;[P] omega(1,1)  
2.51499E-01 ;[P] omega(1,2)  
3.05764E+00 ;[P] omega(2,2)  
2.00414E-01 ;[P] omega(1,3)  
2.59184E-01 ;[P] omega(2,2)  
2.98225E-01 ;[P] omega(3,3)  
1.82774E-01 ;[P] omega(4,4)  
-1.80396E-01 ;[P] omega(2,4)  
2.84009E-01 ;[P] omega(3,4)  
6.96418E-01 ;[P] omega(4,4)

\$OMEGA

3.63178E-01 ;[P] omega(5,5)  
4.85695E-01 ;[P] omega(6,6)  
1.14028E+00 ;[P] omega(7,7)  
3.23764E-01 ;[P] omega(8,8)

\$SIGMA

2.83889E-02 ;[P] sigma(1,1)  
7.77007E+00 ;[A] sigma(2,2)

\$EST METHOD=1 INTERACTION PRINT=1 MAX=99999 NSIG=3 NOHABORT SIGL=10

\$COV

\$TABLE ID TIME CL V1 Q V2 PRED IPRE CWRES CPBT AMT RATE DV EVID WT PRIM CO  
AGE CUF MUFON MUF COAT CPBTOT TEMP ETA1 ETA2 ETA3 ETA4 ETA5 ETA6 ETA7 ETA8

ONEHEADER NOPRINT FILE=6003.tab

\$TABLE ID CL V1 Q V2 PRED IPRE CWRES FIRSTONLY NOAPPEND NOPRINT FILE=6003.par

\$TABLE ID ETA1 ETA2 ETA3 ETA4 ETA5 ETA6 ETA7 ETA8 FIRSTONLY NOAPPEND NOPRINT  
FILE=6003.eta
