# Supplementary material
Source: PubMed Central journal article supplement (PMC6993105)

# Neonatal Dexmedetomidine Dosing Targeting a Steady-State Concentration of 200 pg/mL (Allometric model)

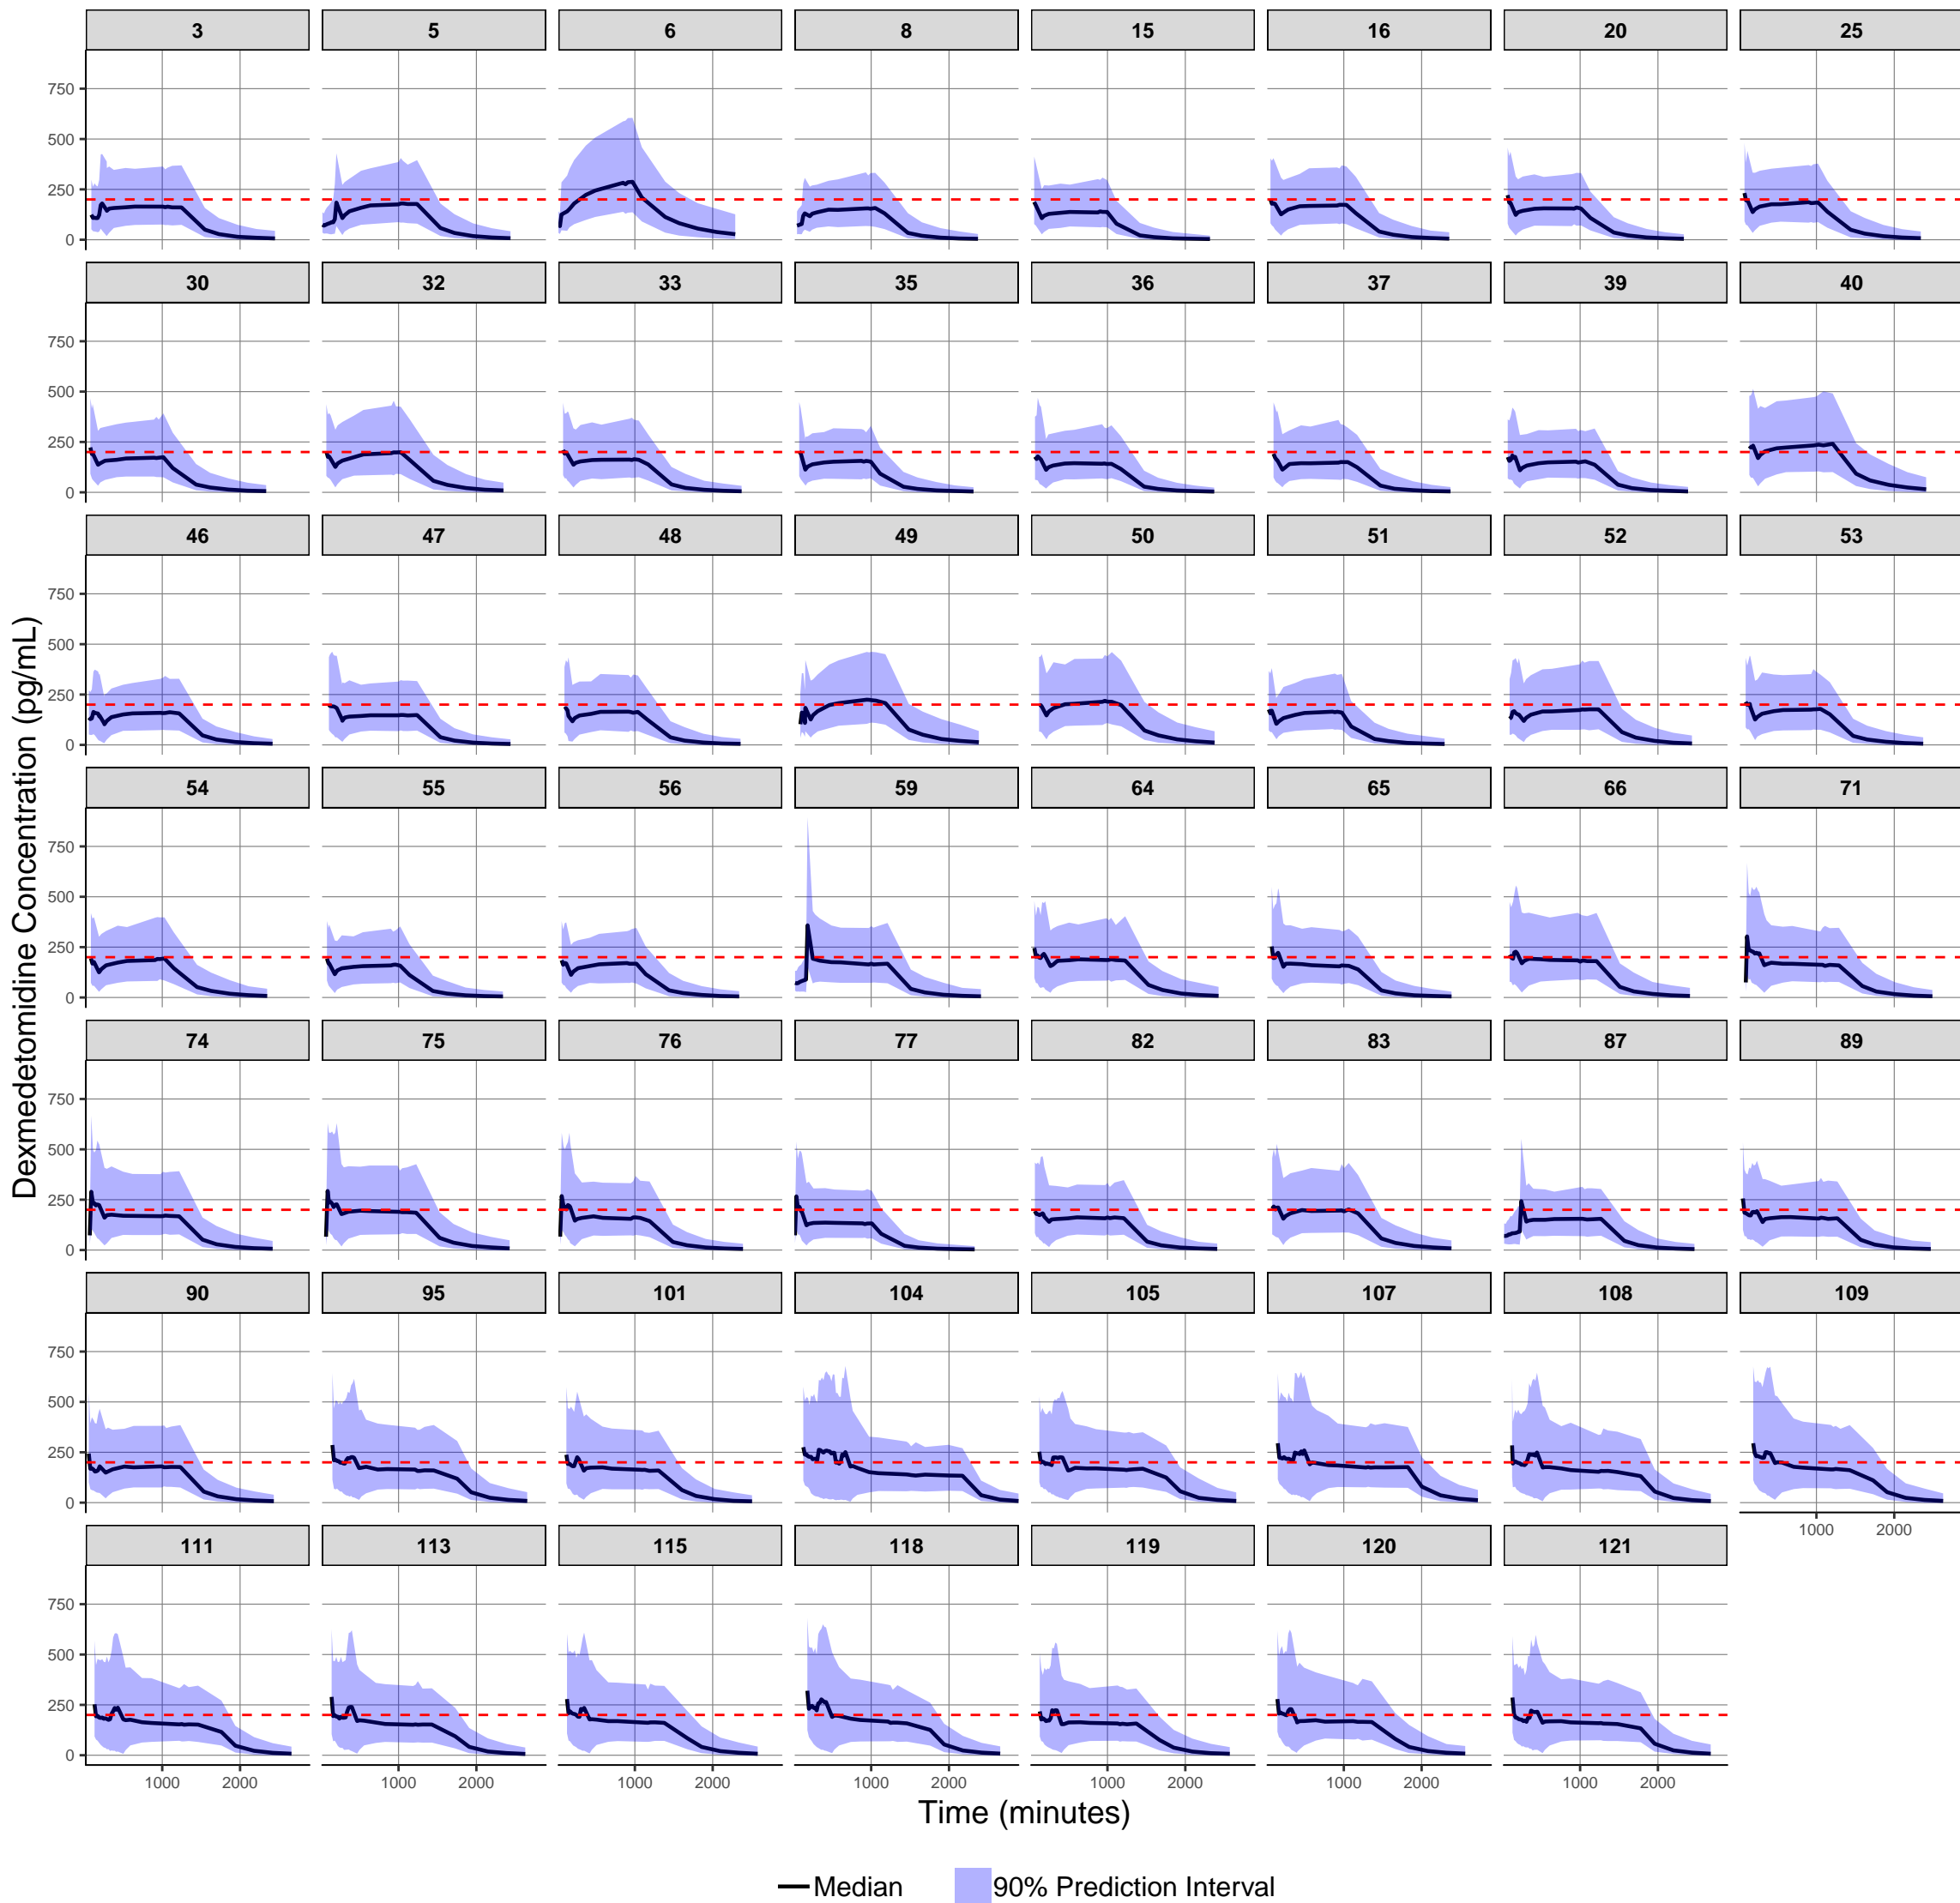

Supplement: mmc9.pdf [file mmc9.pdf]
