# Supplementary material
Source: PubMed Central journal article supplement (PMC6993105)

# Neonatal Dexmedetomidine Dosing Targeting a Steady-State Concentration of 700 pg/mL (Allometric model)

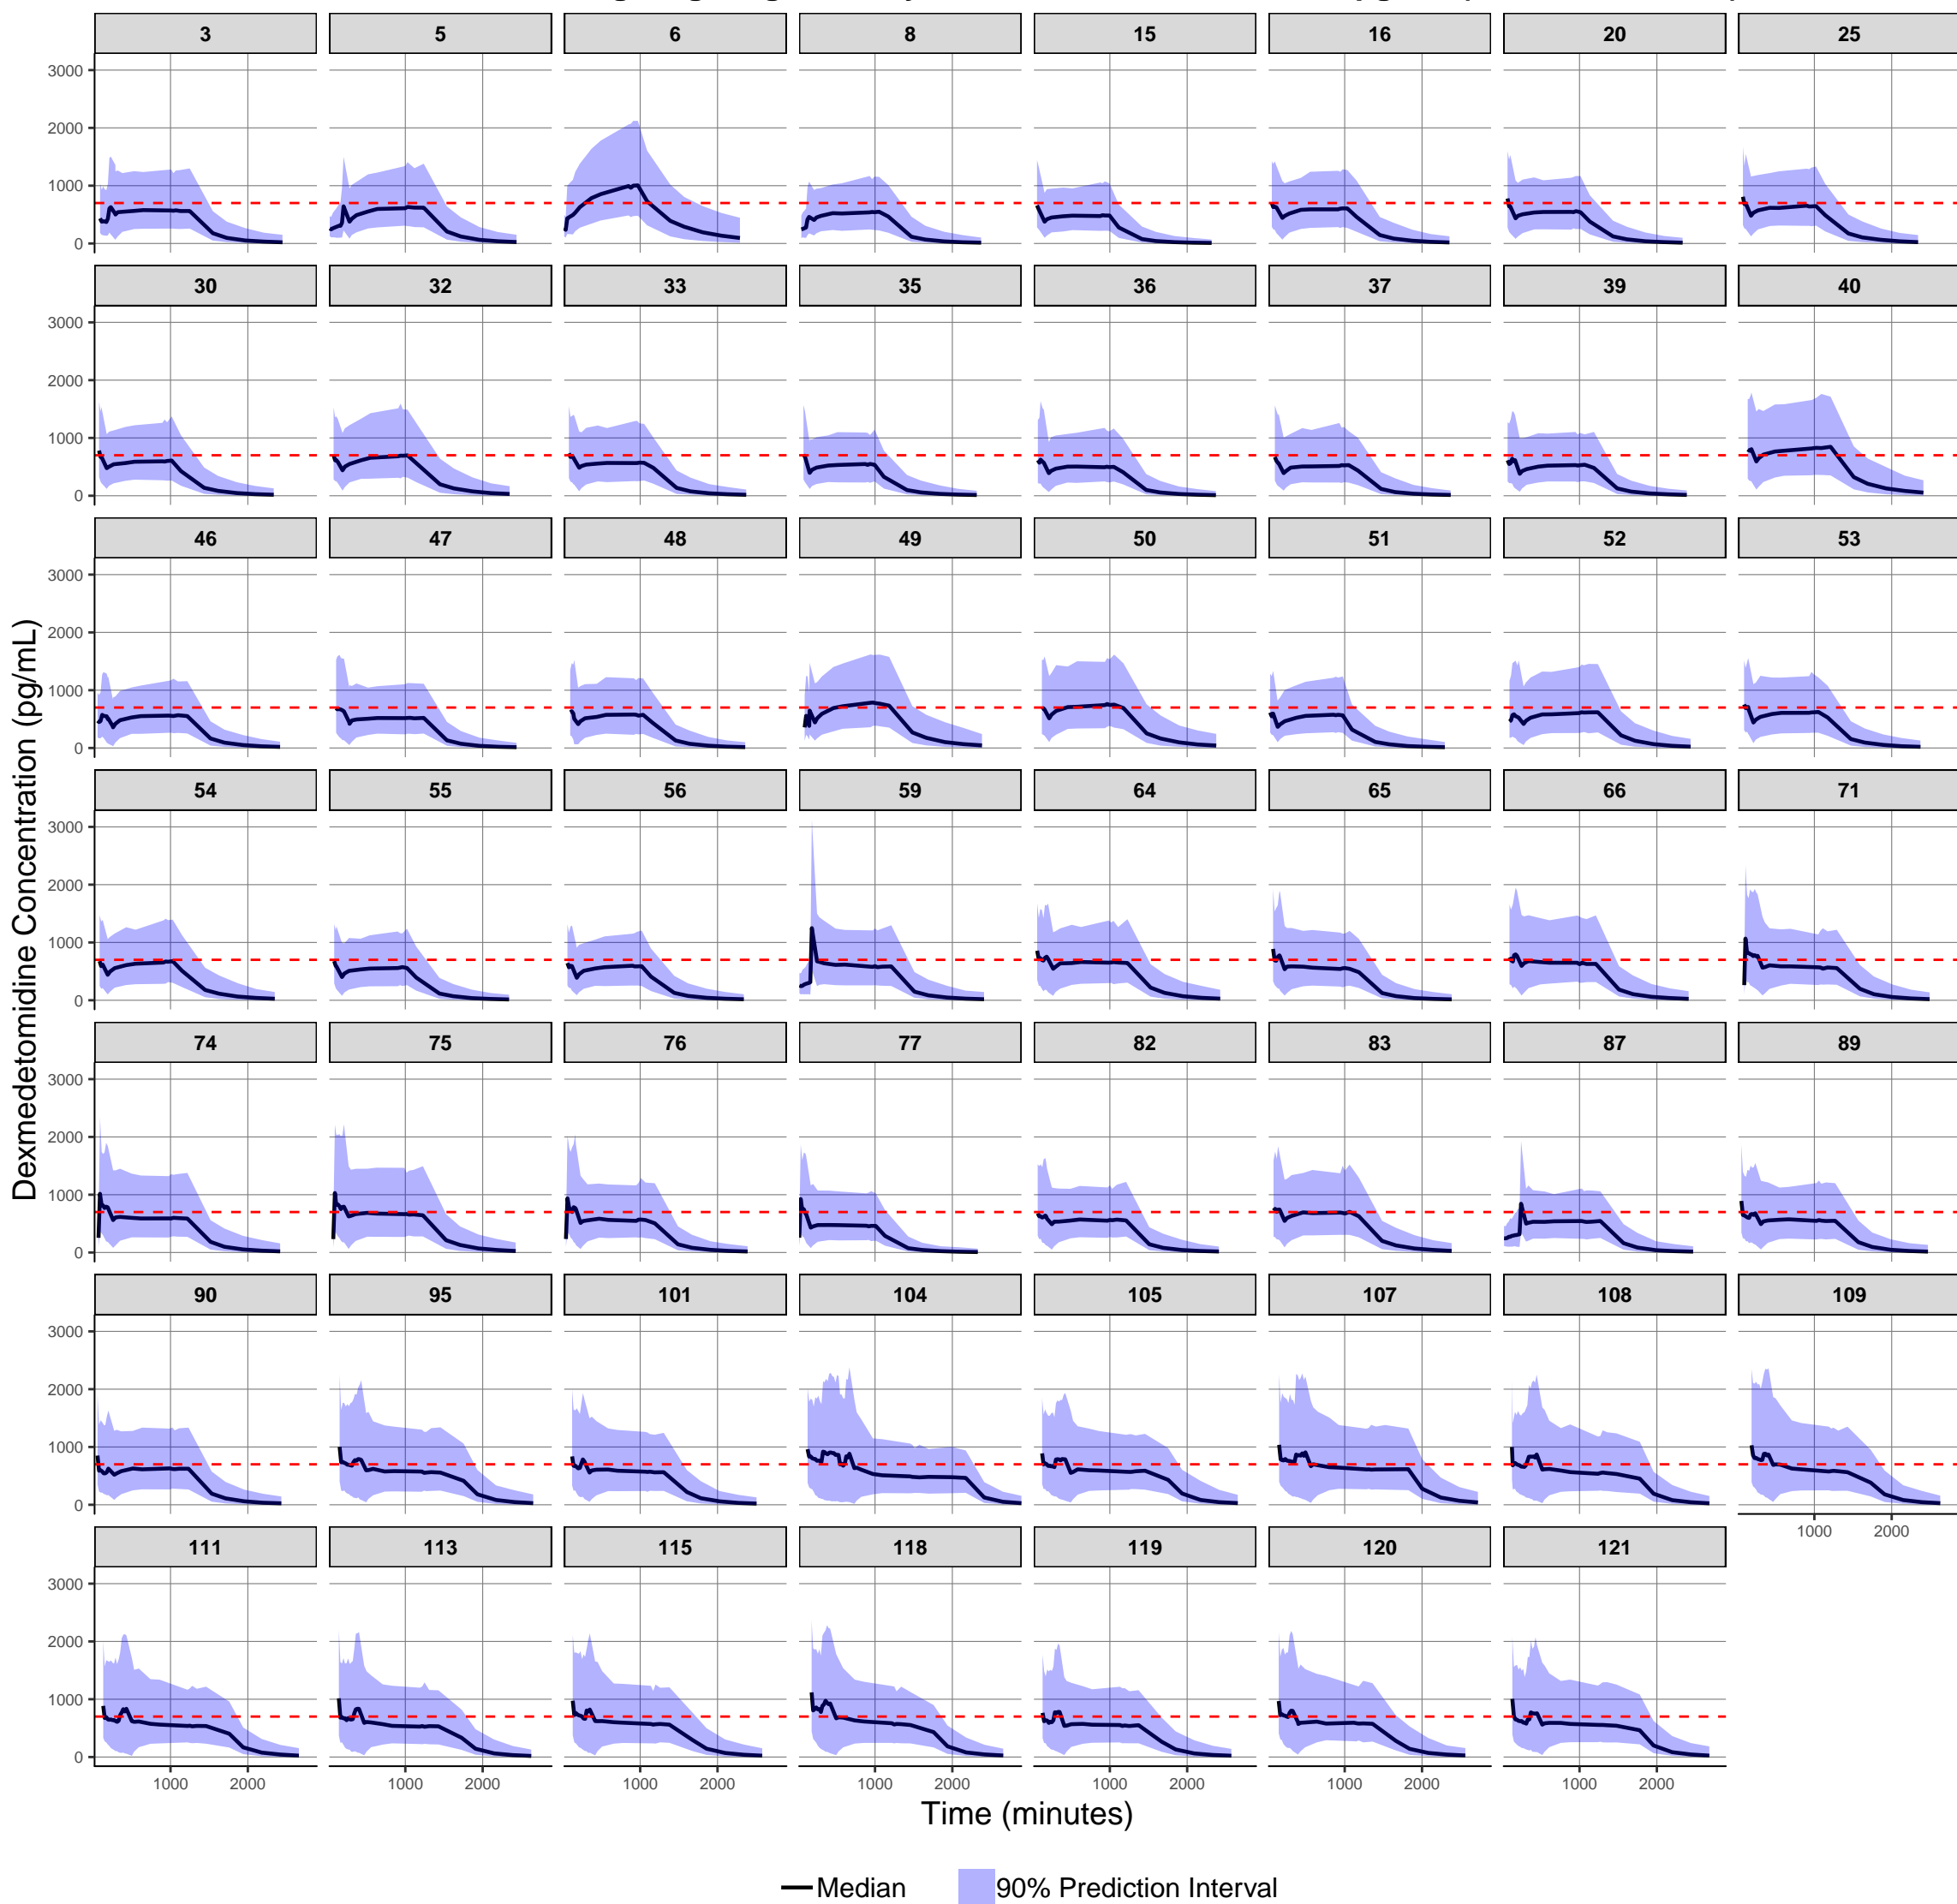

Supplement: mmc11.pdf [file mmc11.pdf]
