# Supplementary material
Source: PubMed Central journal article supplement (PMC6993105)

# Neonatal Dexmedetomidine Dosing Targeting a Steady-State Concentration of 1000 pg/mL (Allometric model)

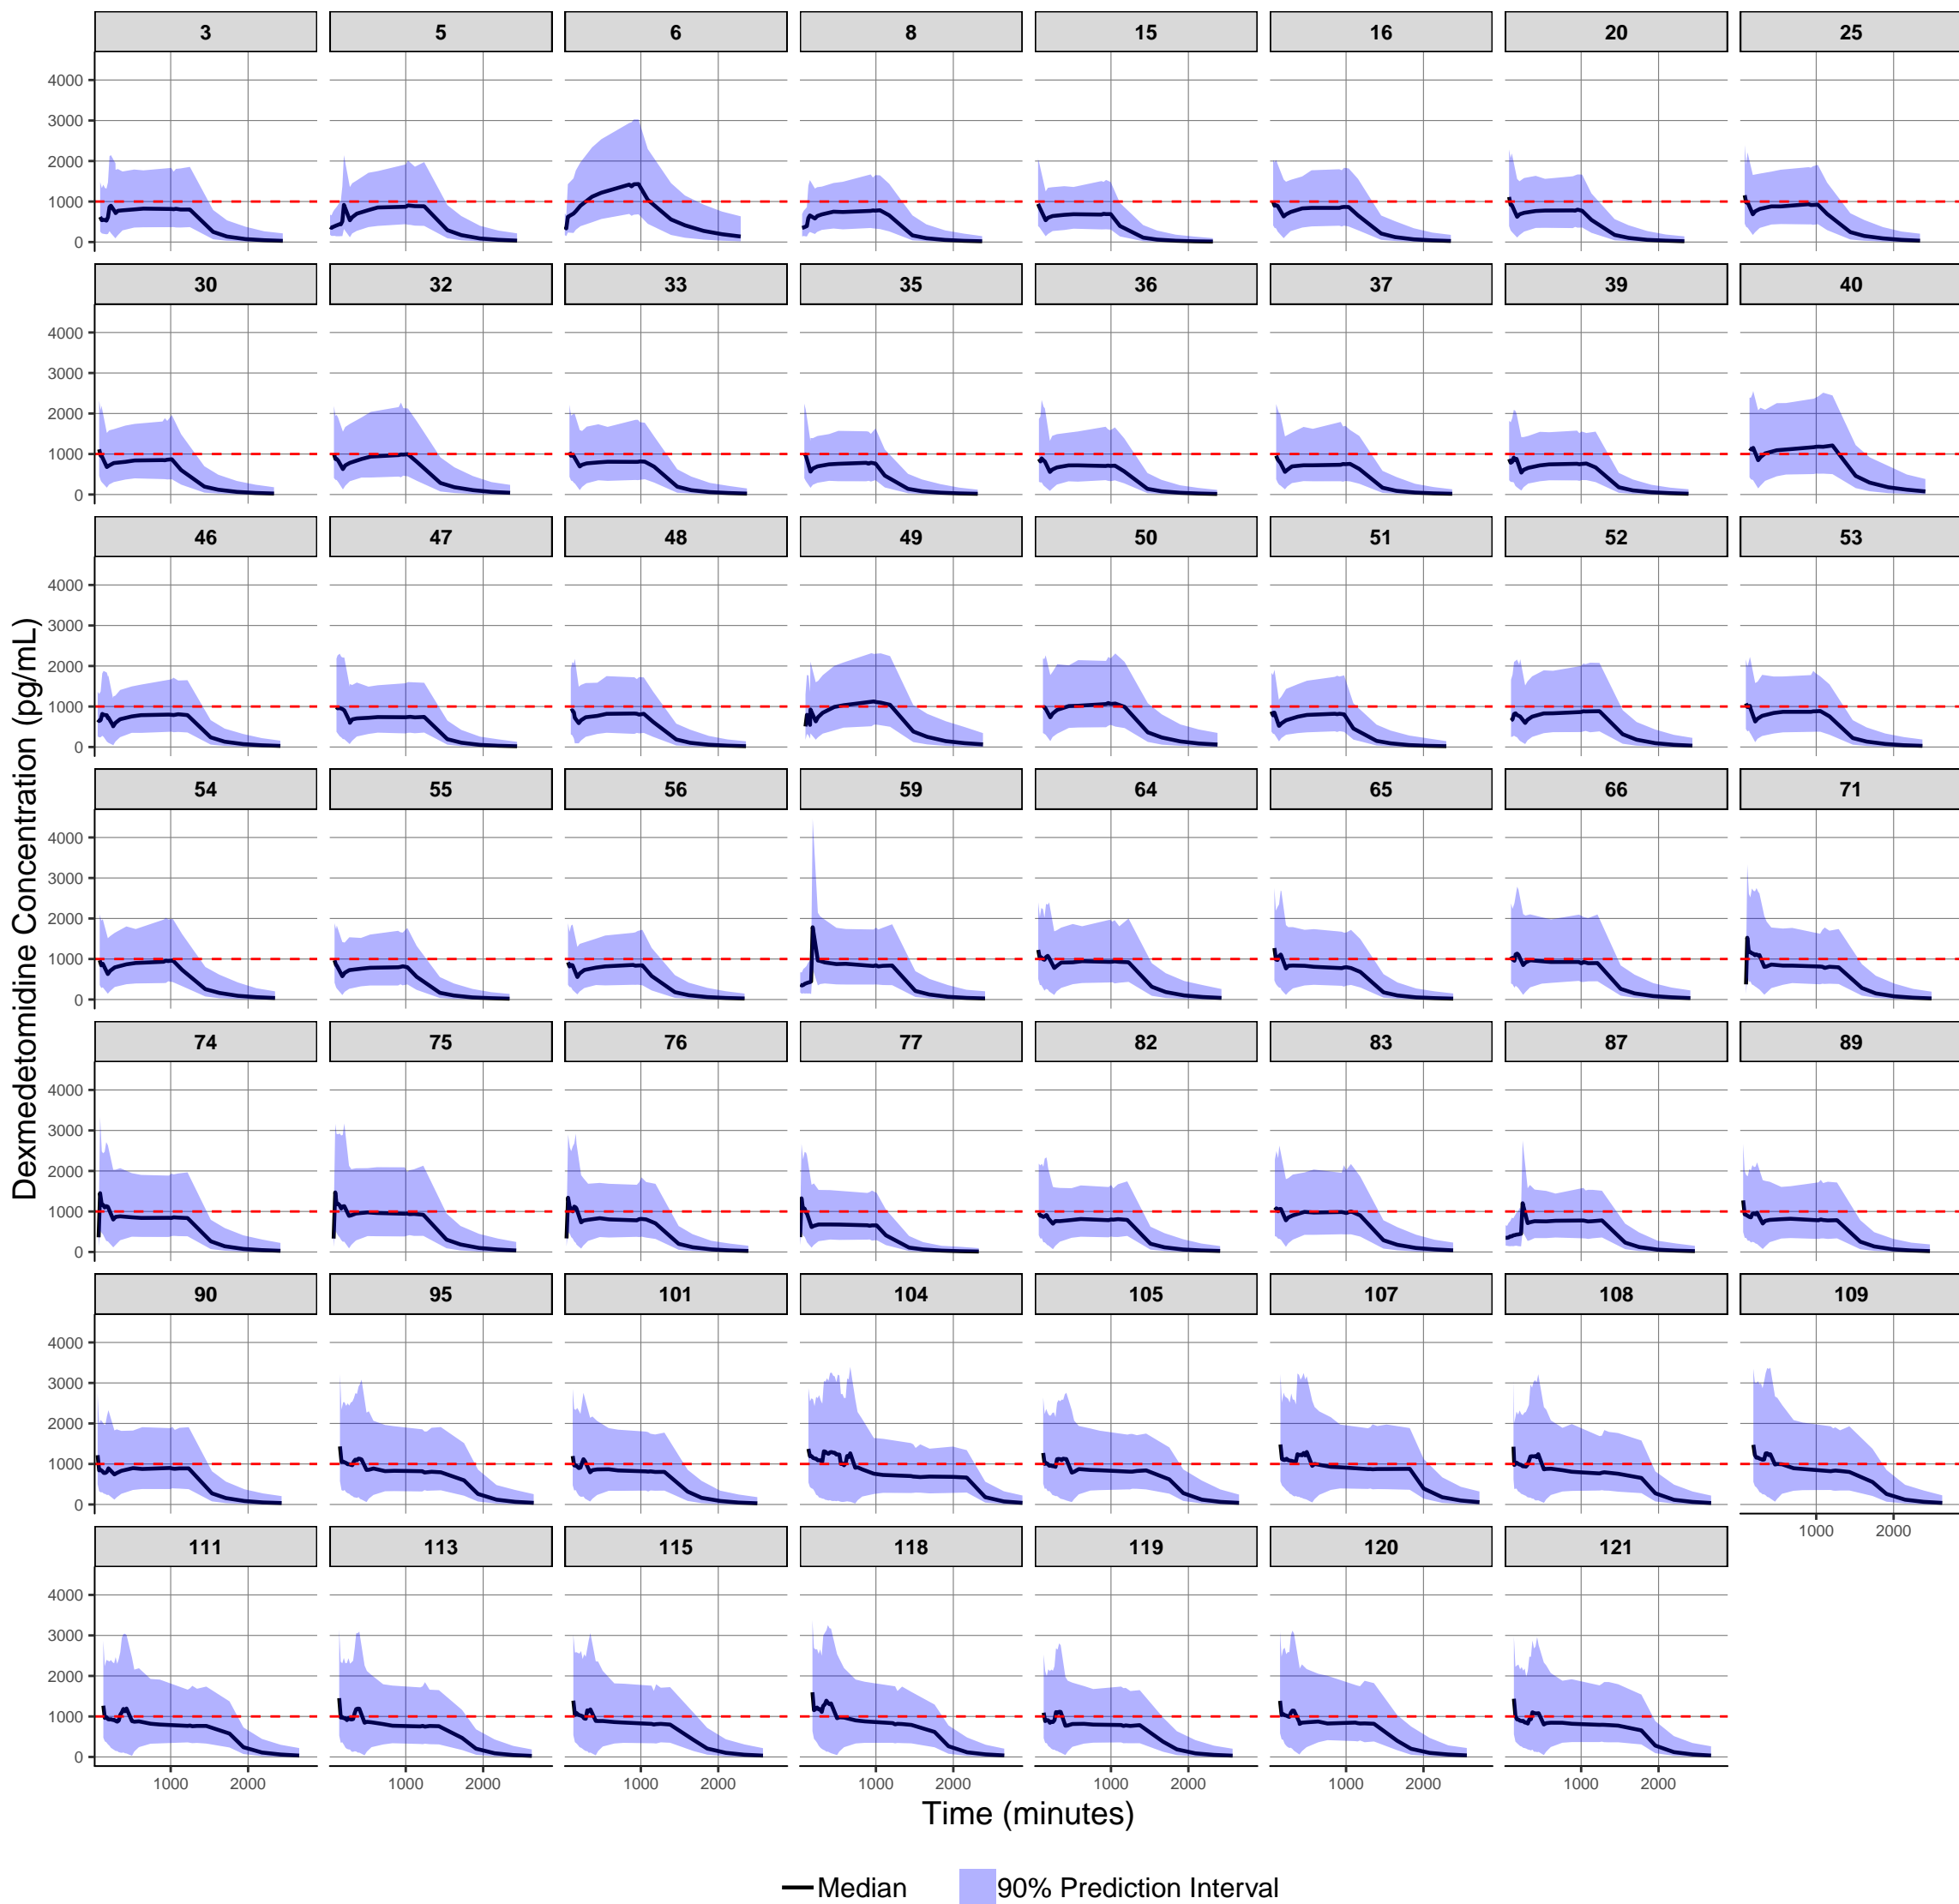

Supplement: mmc12.pdf [file mmc12.pdf]
