# Supplementary material
Source: PubMed Central journal article supplement (PMC6993105)

# Neonatal Dexmedetomidine Dosing Targeting a Steady-State Concentration of 200 pg/mL (Linear model)

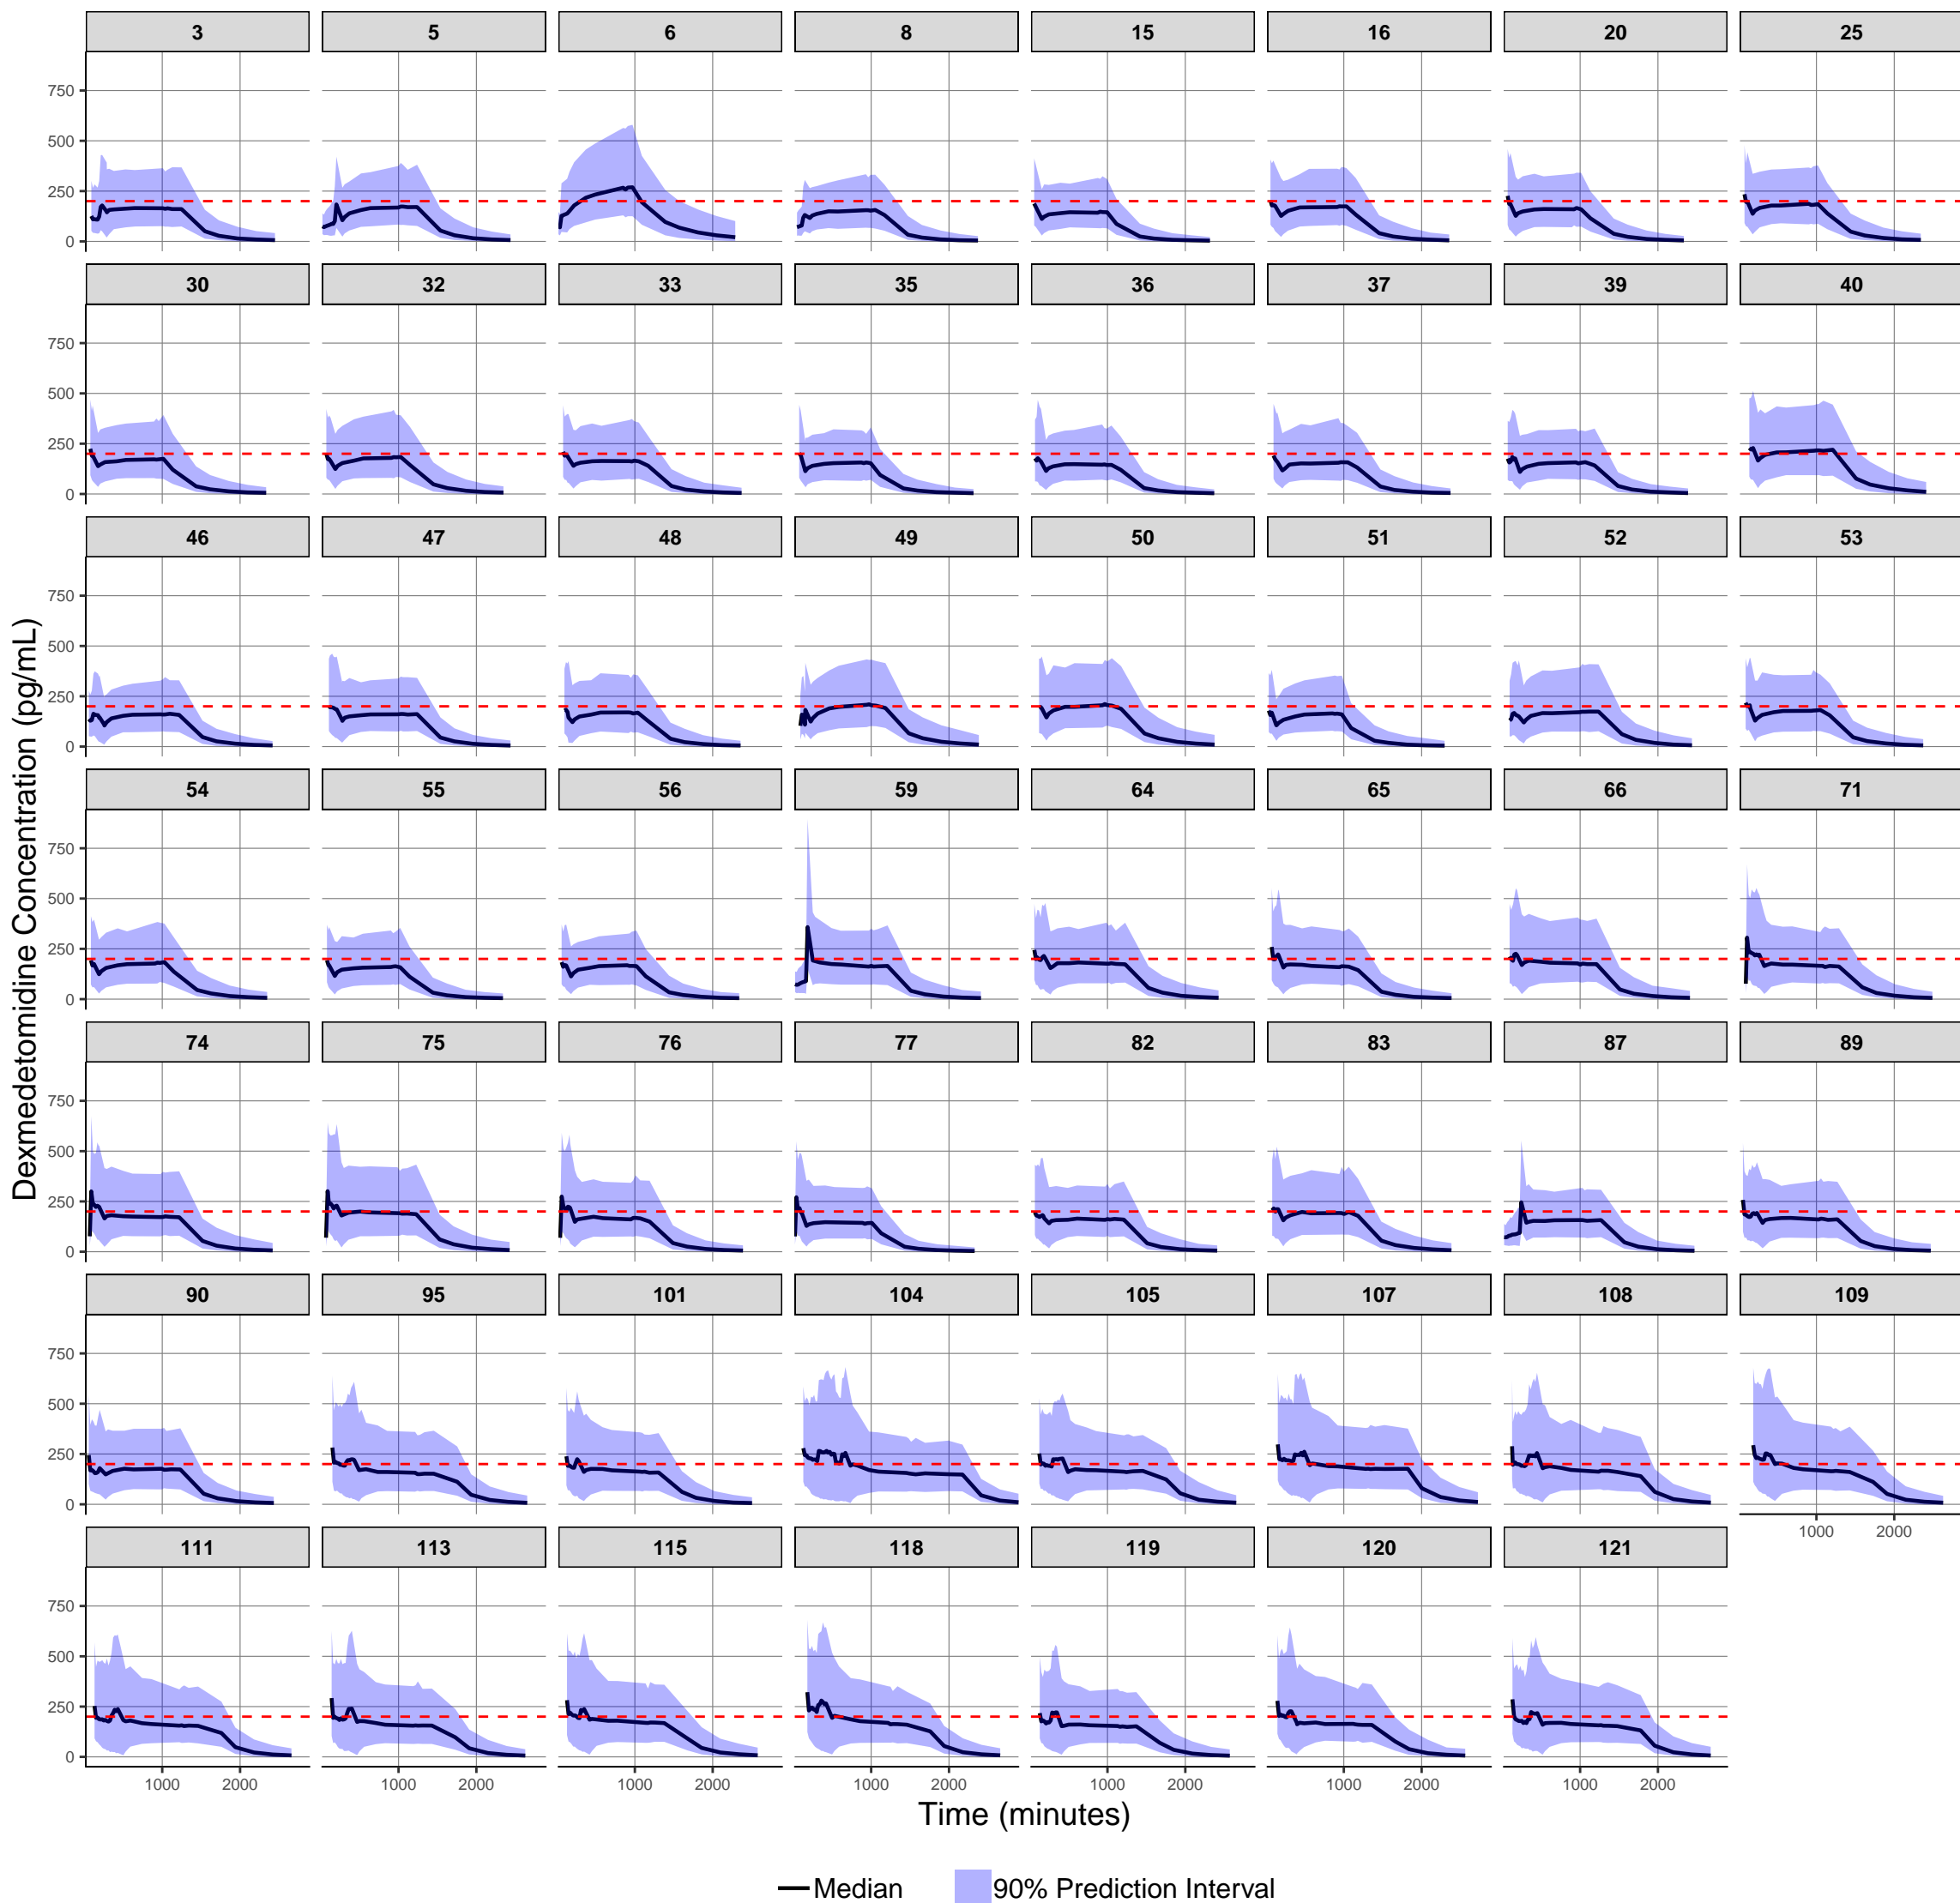

Supplement: mmc13.pdf [file mmc13.pdf]
