# Supplementary material
Source: PubMed Central journal article supplement (PMC6993105)

# Neonatal Dexmedetomidine Dosing Targeting a Steady-State Concentration of 700 pg/mL (Linear model)

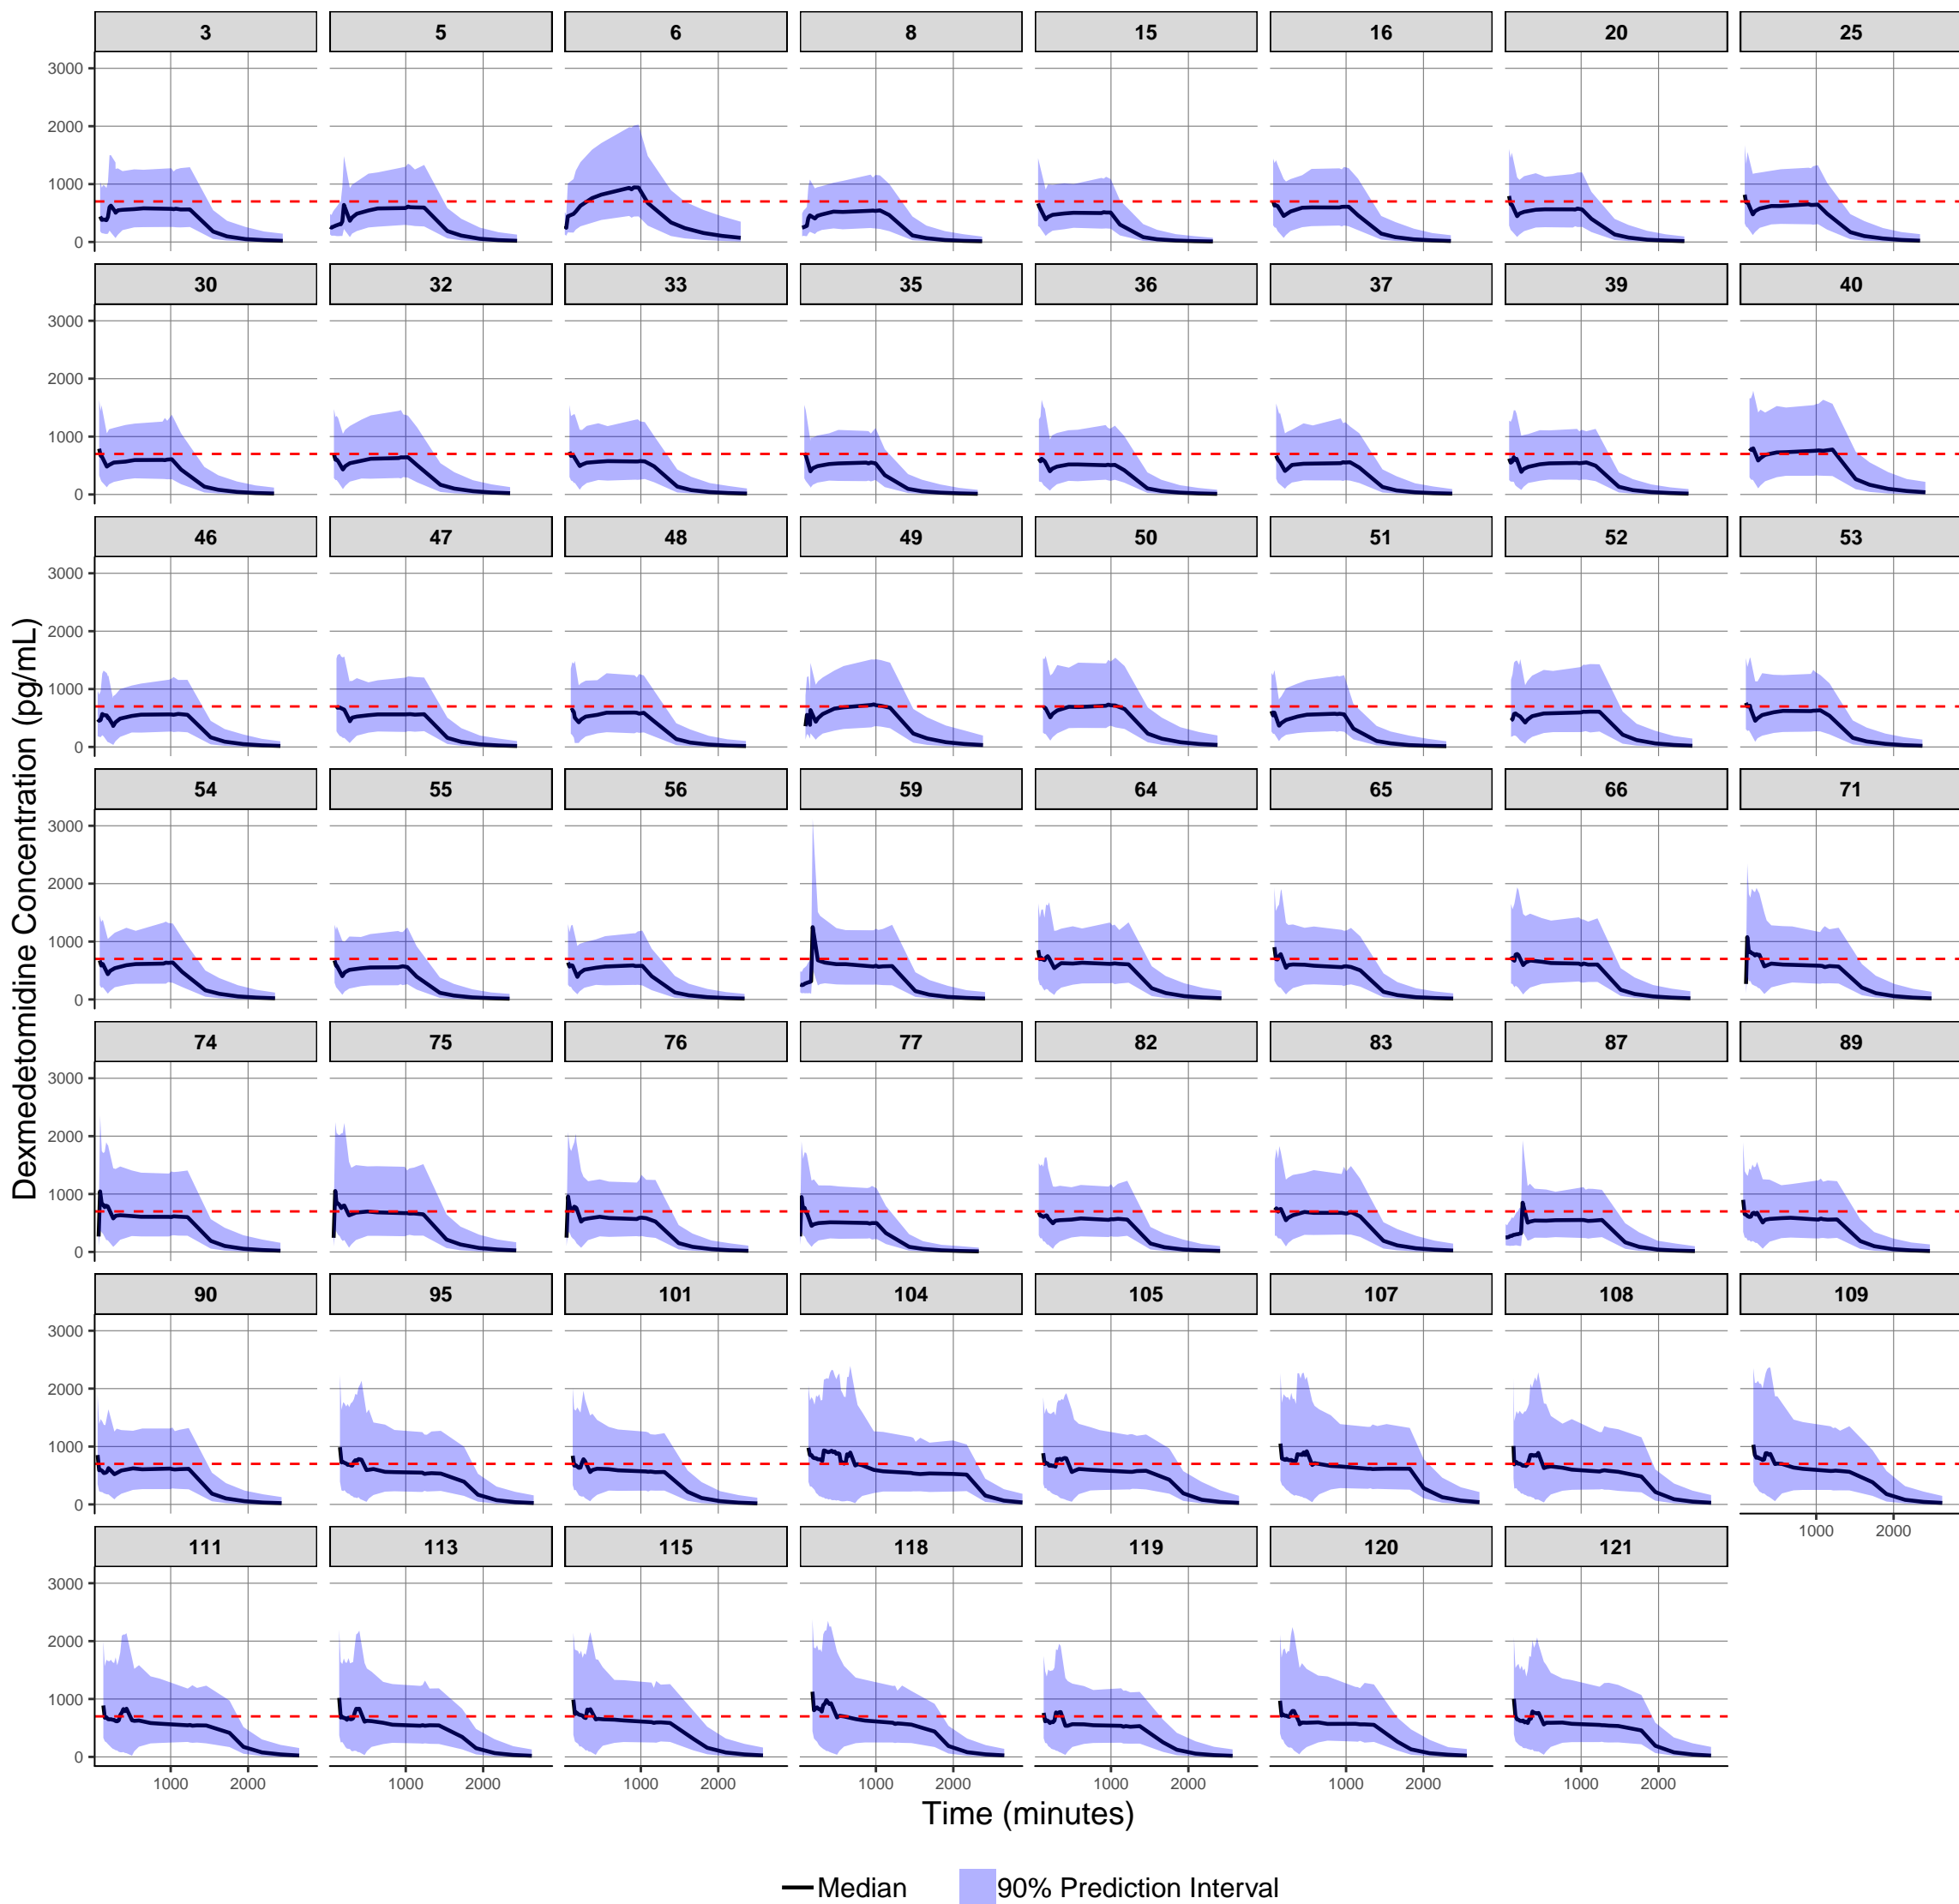

Supplement: mmc15.pdf [file mmc15.pdf]
