# Supplementary material
Source: PubMed Central journal article supplement (PMC6993105)

# Neonatal Dexmedetomidine Dosing Targeting a Steady-State Concentration of 1000 pg/mL (Linear model)

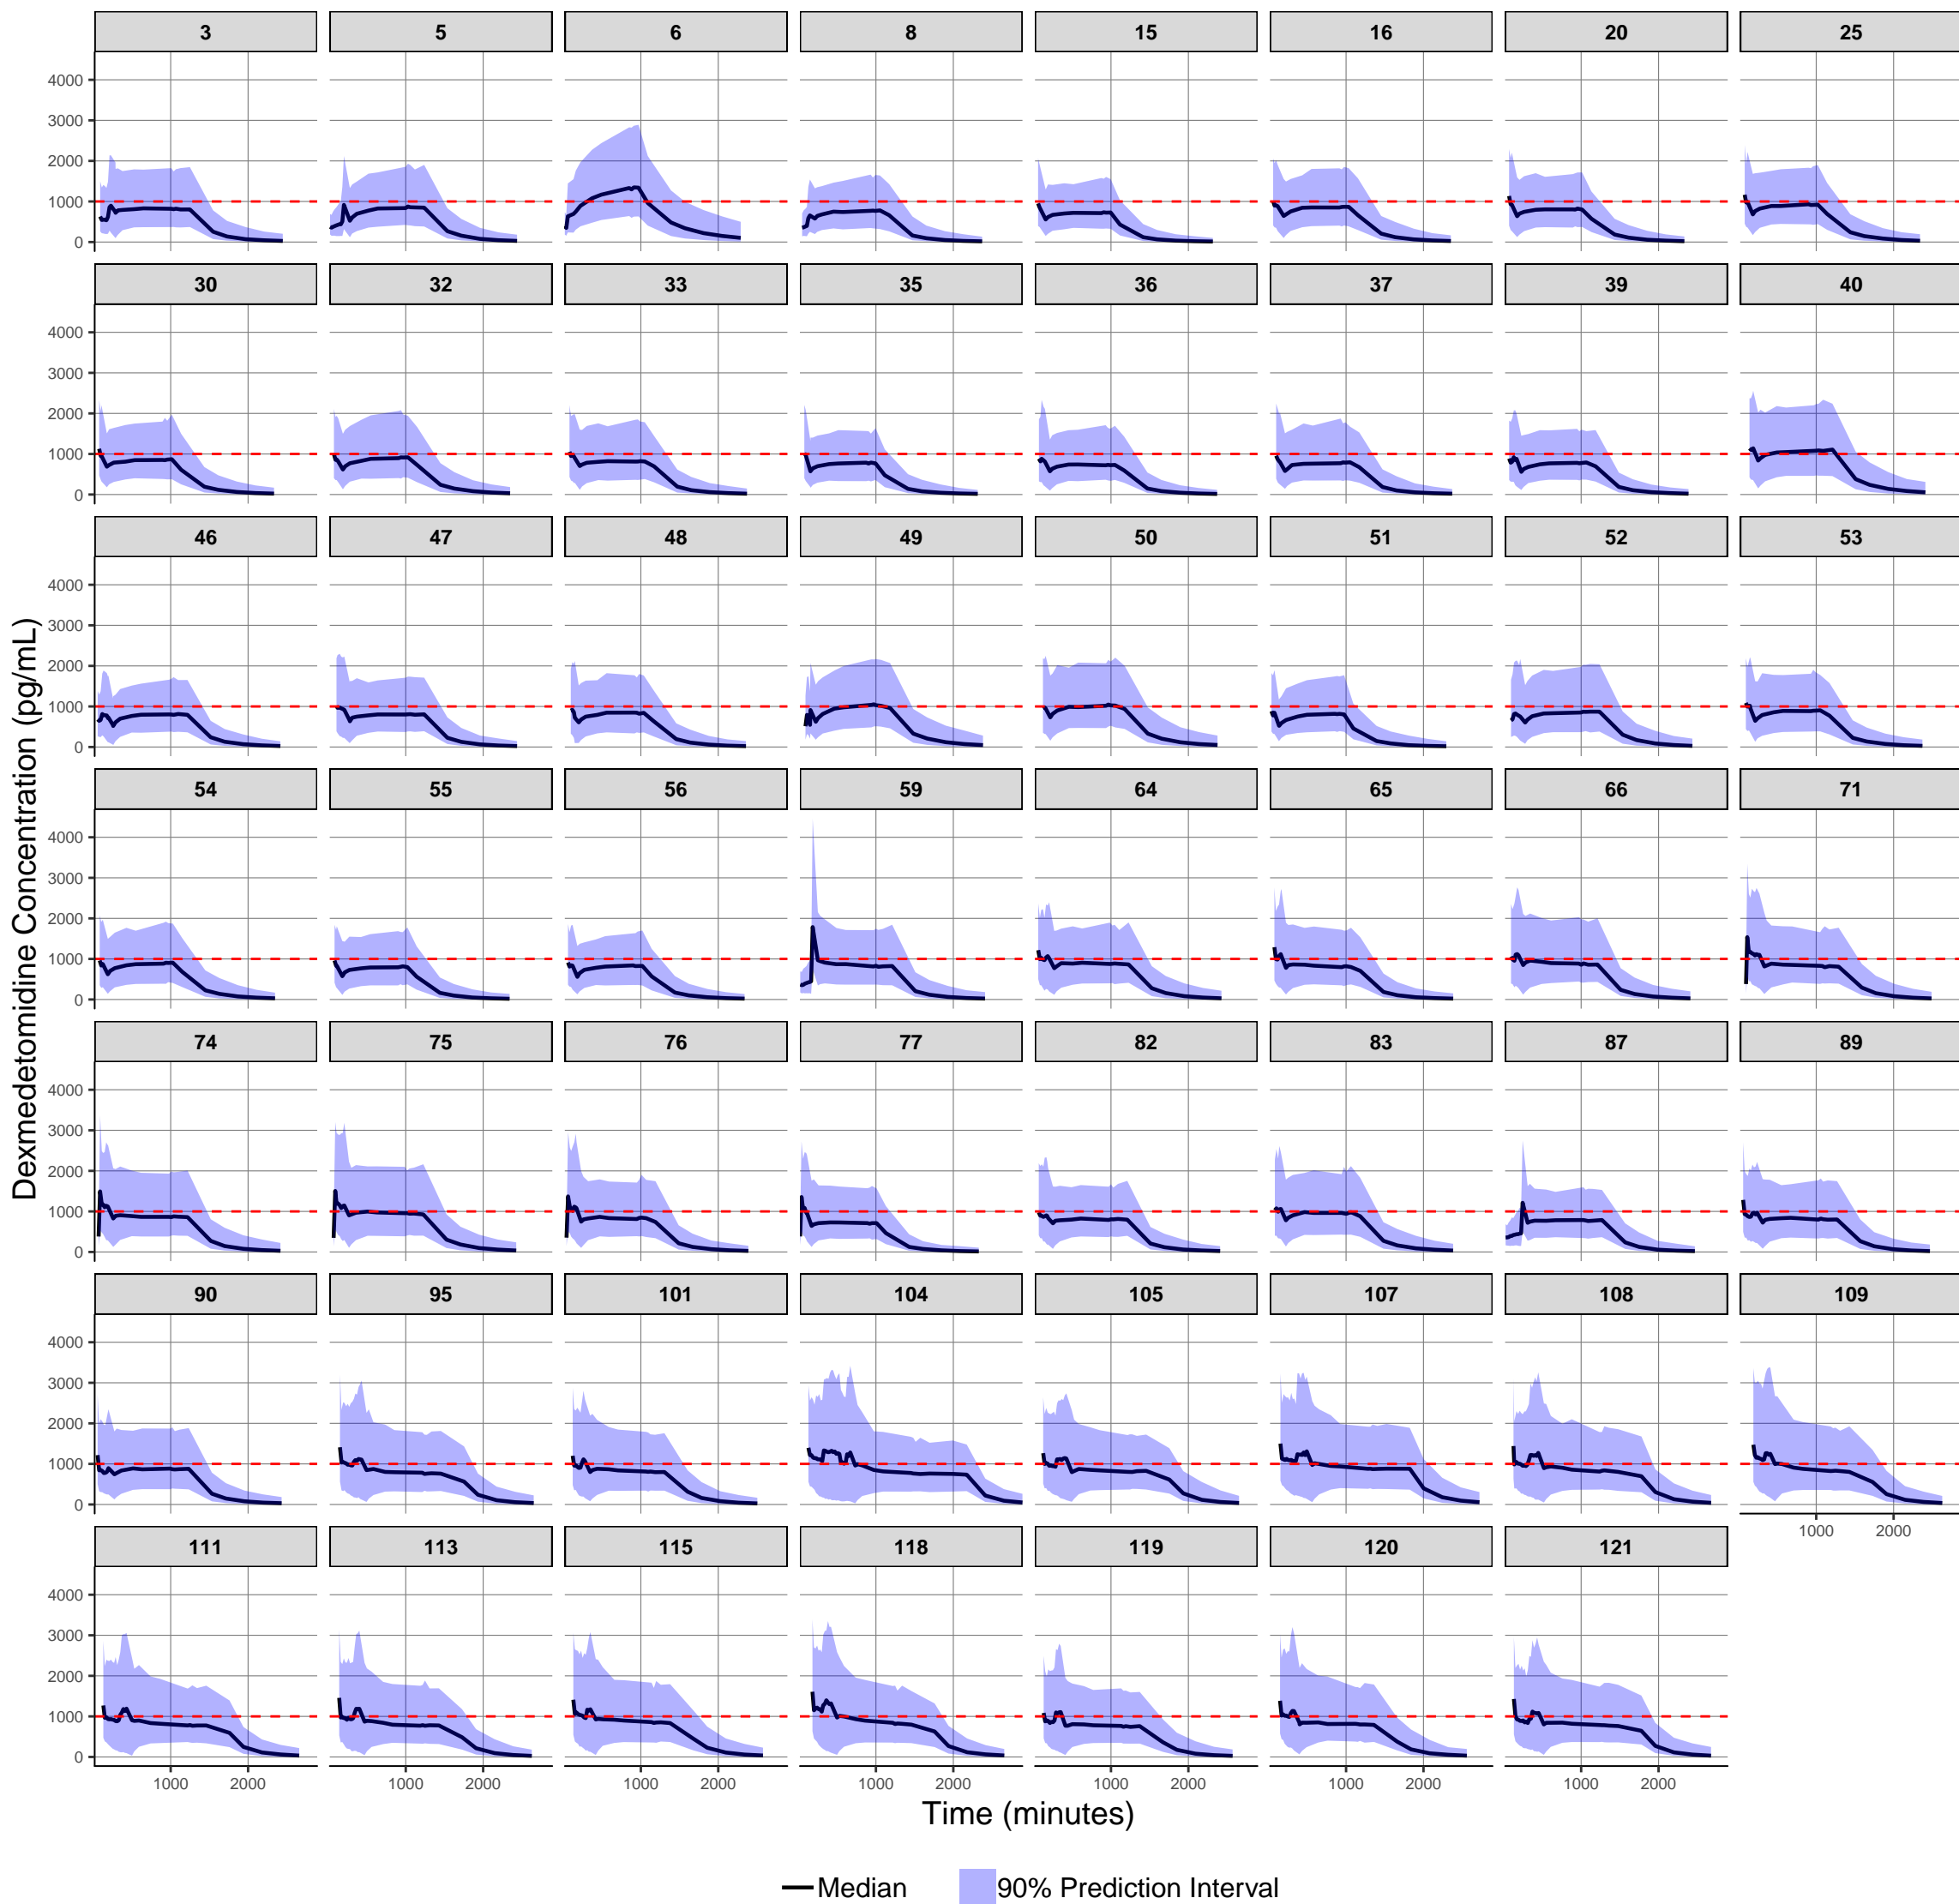

Supplement: mmc16.pdf [file mmc16.pdf]
