# Supplementary material
Source: PubMed Central journal article supplement (PMC6993105)

# Infant Dexmedetomidine Dosing Targeting a Steady-State Concentration of 700 pg/mL (Allometric model)

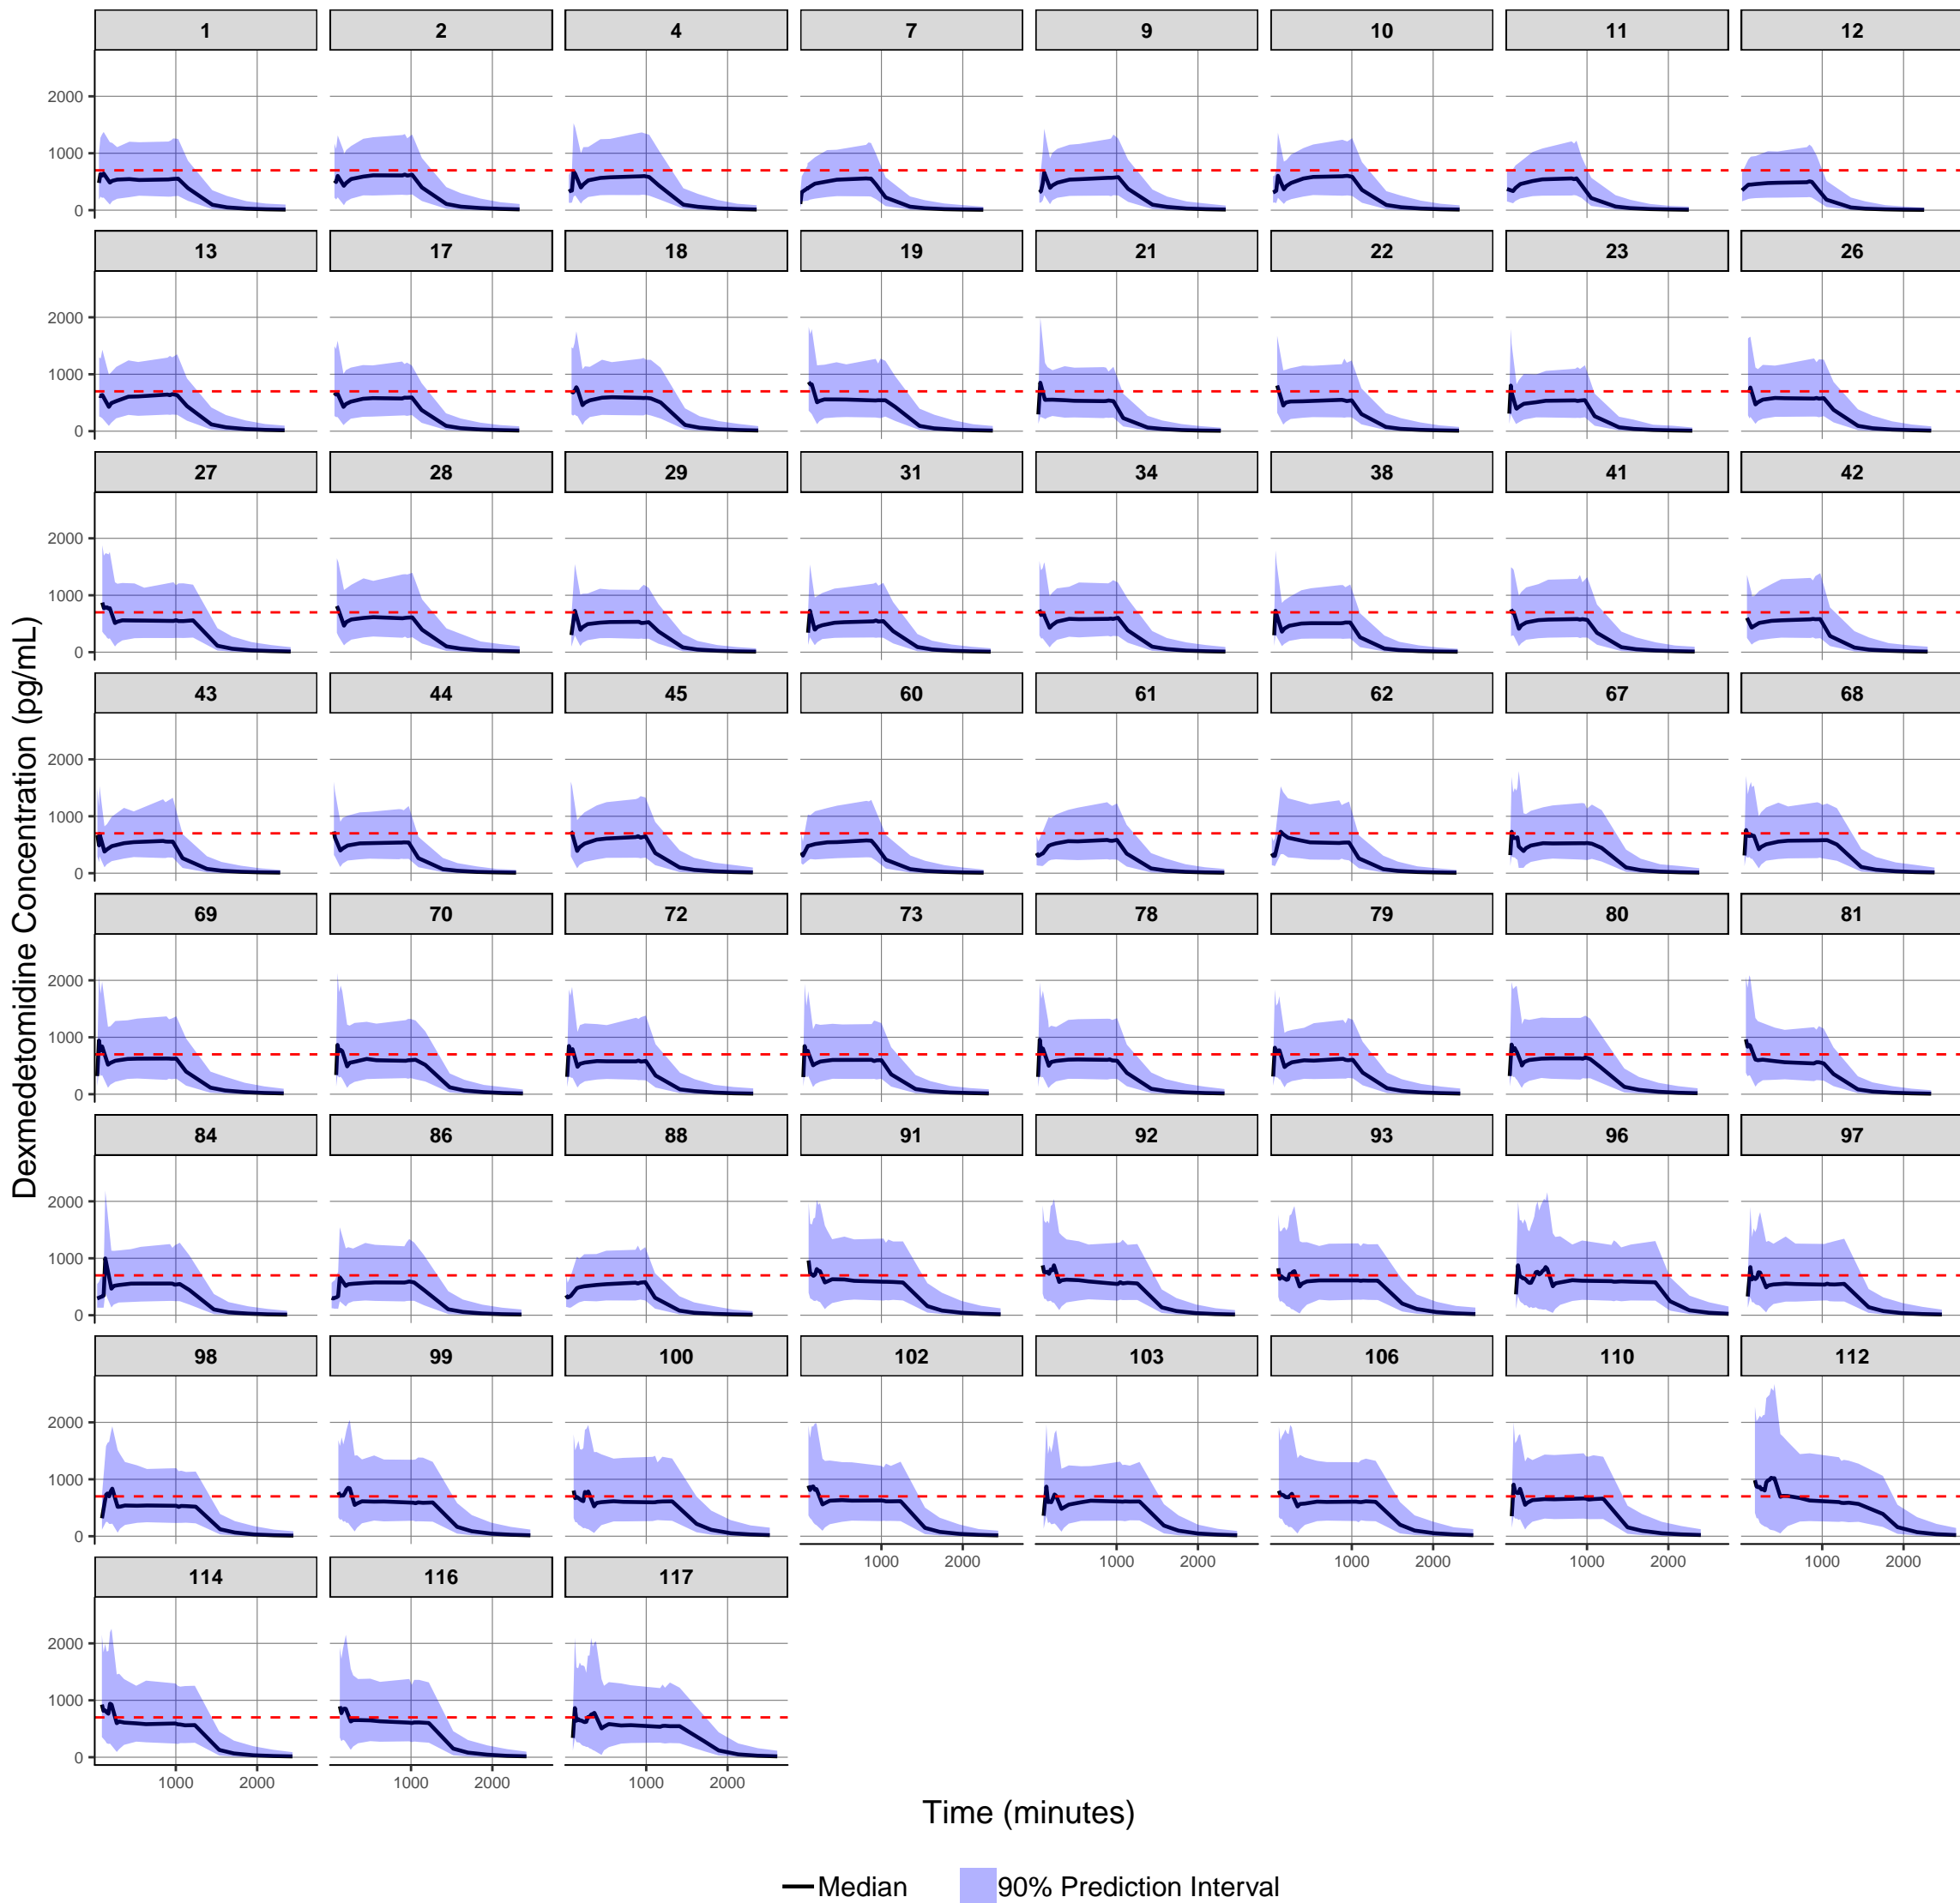

Supplement: mmc19.pdf [file mmc19.pdf]
