# Supplementary material
Source: PubMed Central journal article supplement (PMC6993105)

# Infant Dexmedetomidine Dosing Targeting a Steady-State Concentration of 200 pg/mL (Linear model)

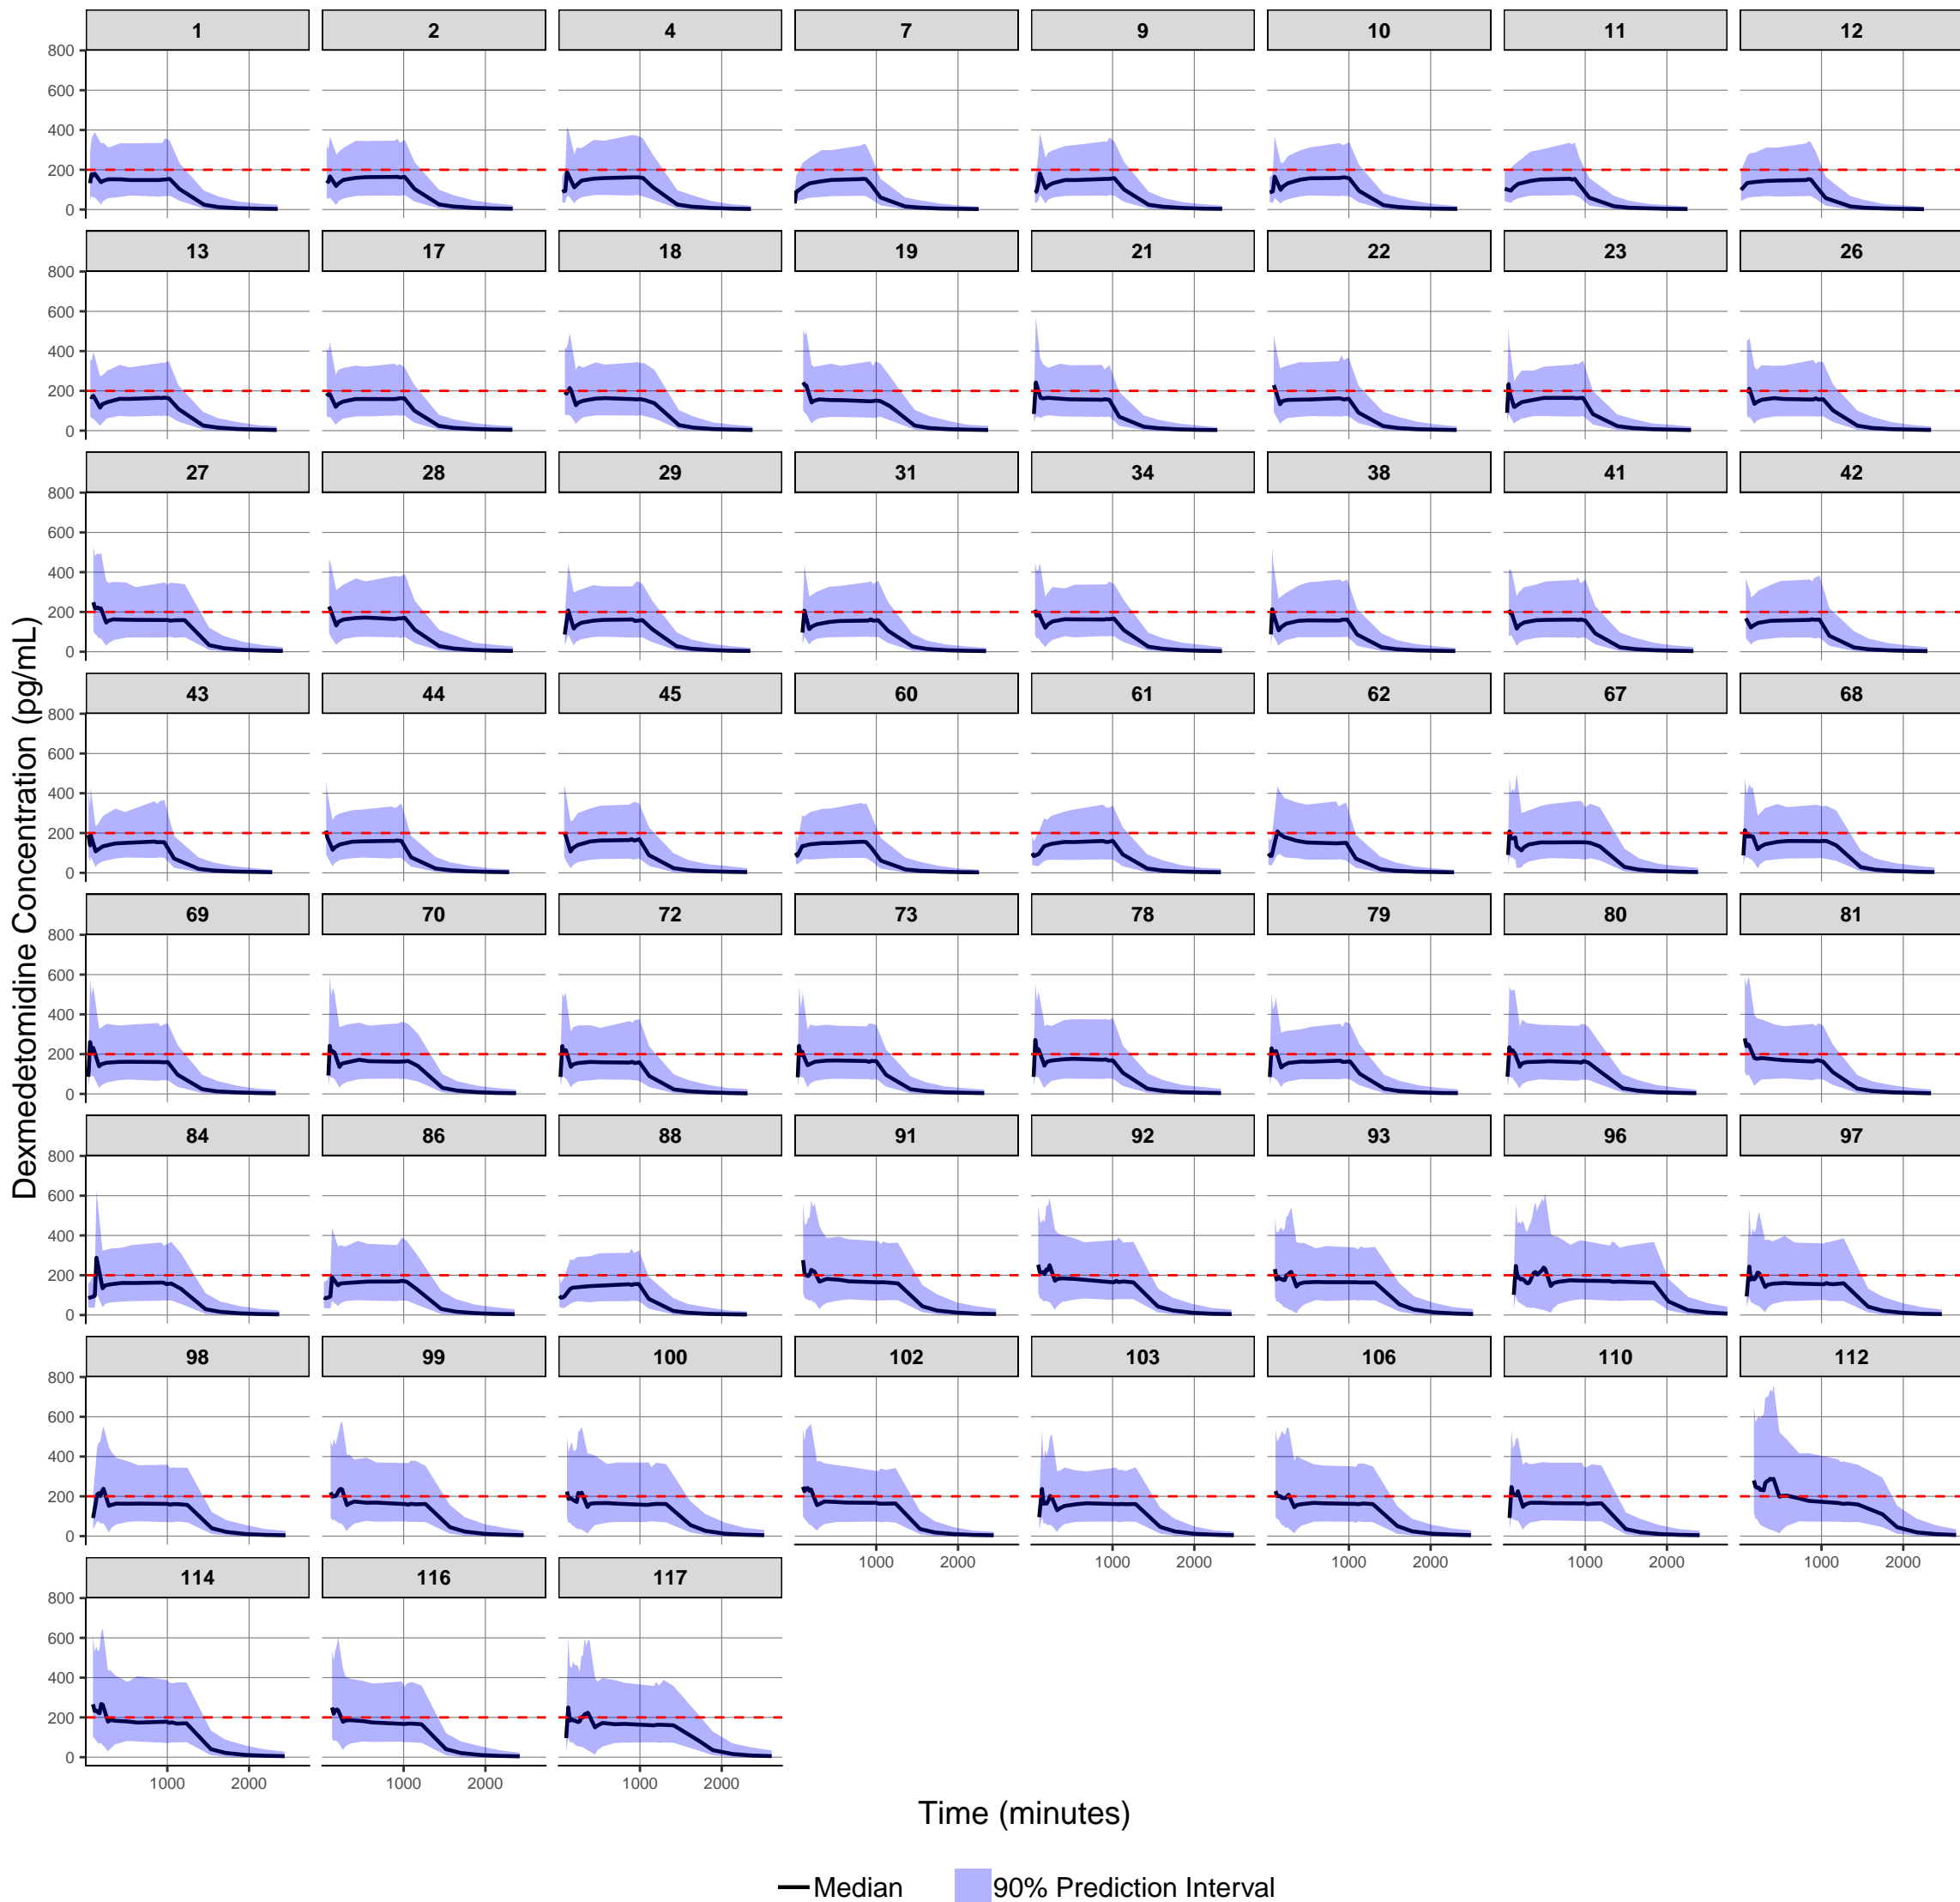

Supplement: mmc21.pdf [file mmc21.pdf]

# Infant Dexmedetomidine Dosing Targeting a Steady-State Concentration of 500 pg/mL (Linear model)

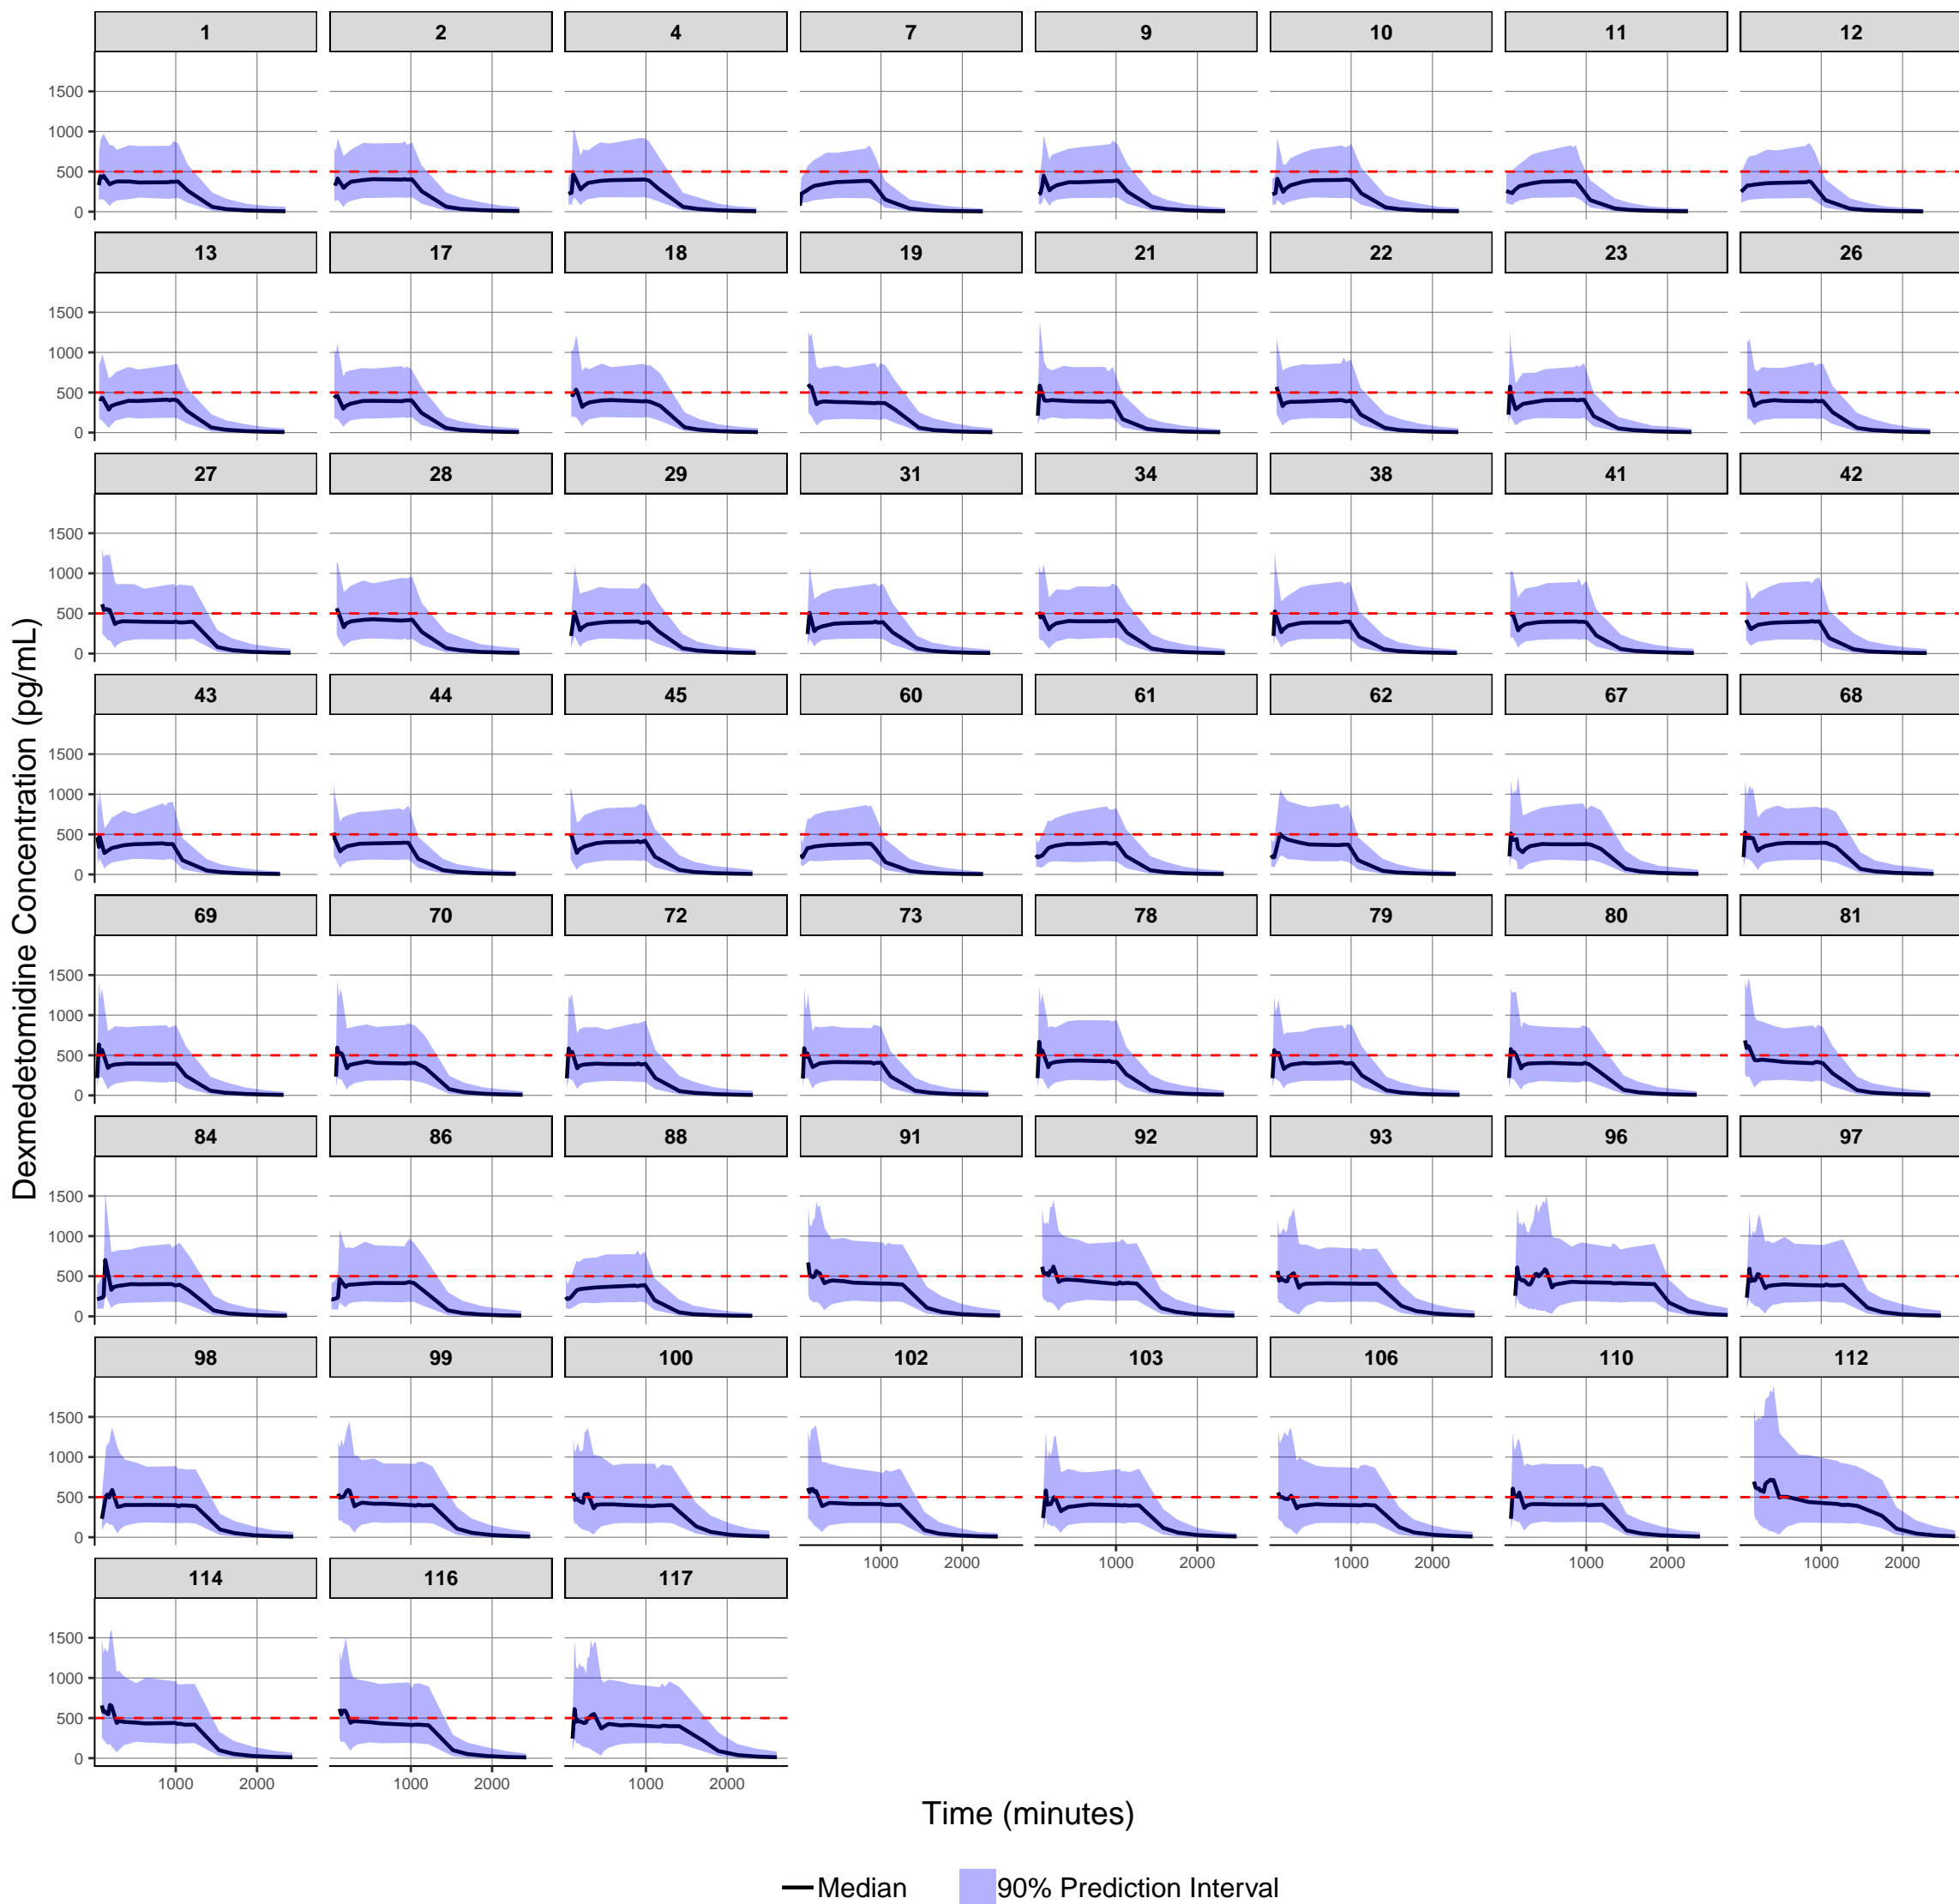

Supplement: mmc22.pdf [file mmc22.pdf]

# Infant Dexmedetomidine Dosing Targeting a Steady-State Concentration of 700 pg/mL (Linear model)

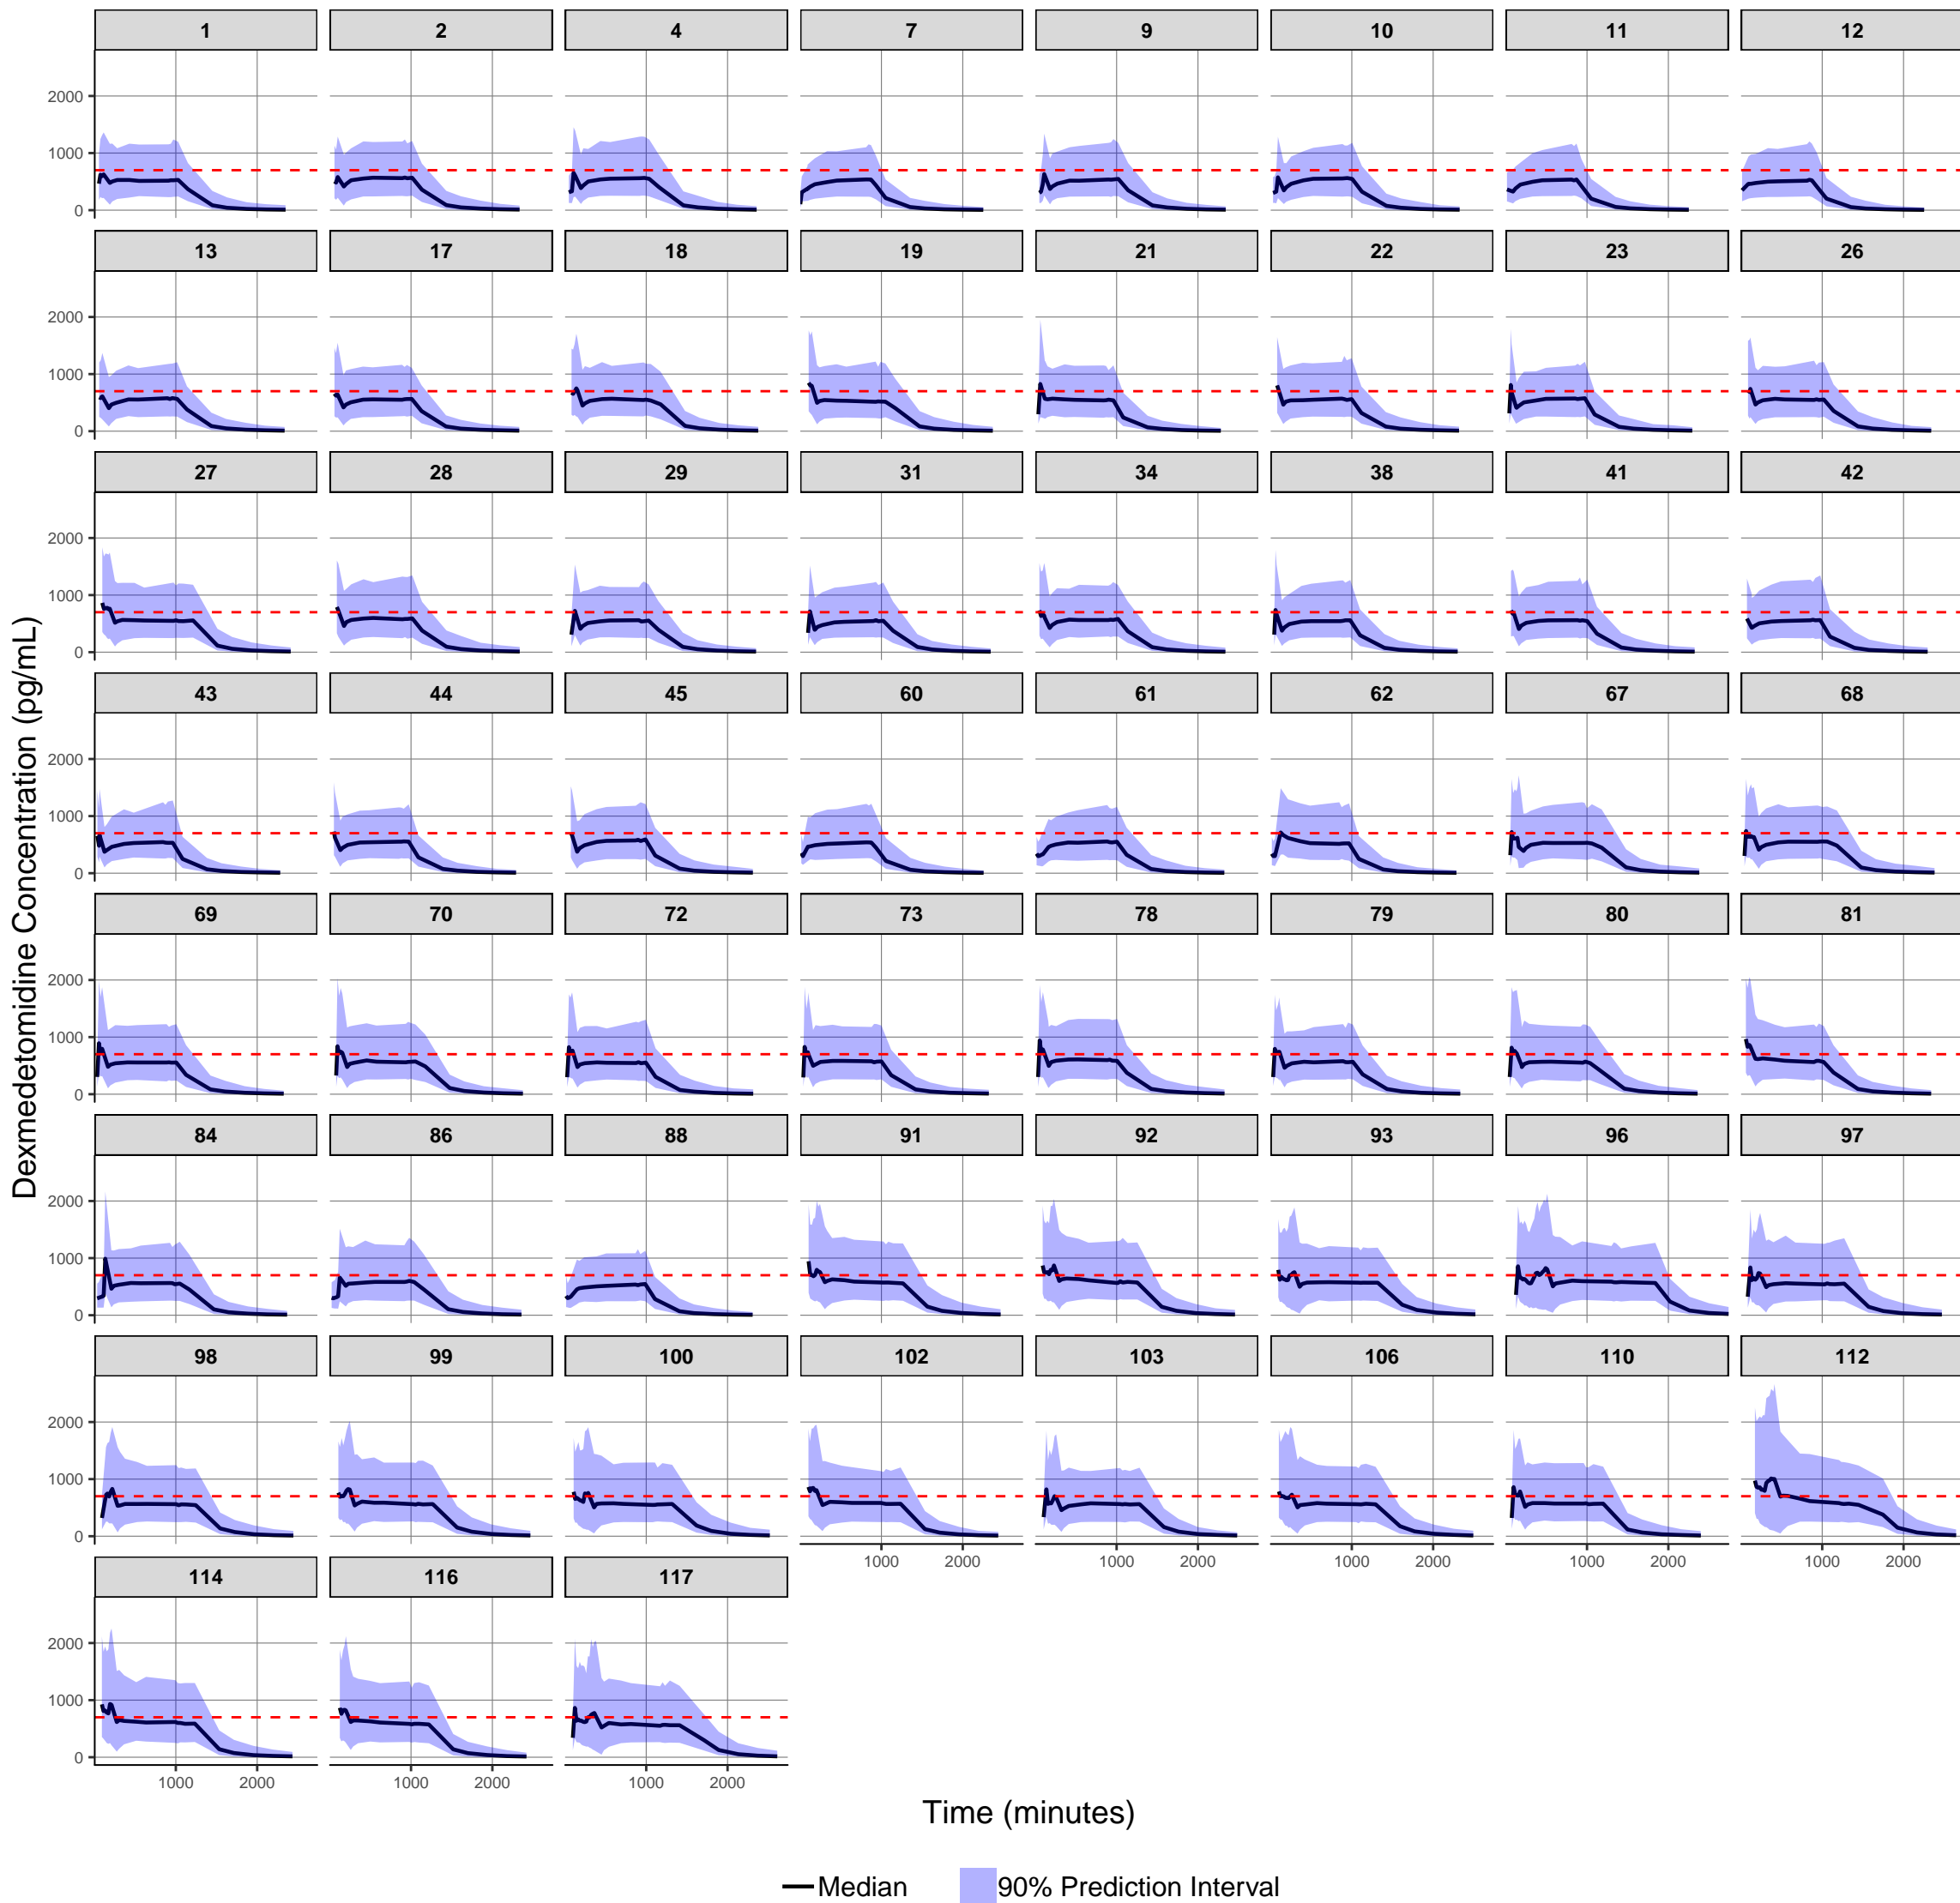

Supplement: mmc23.pdf [file mmc23.pdf]

# Allometric

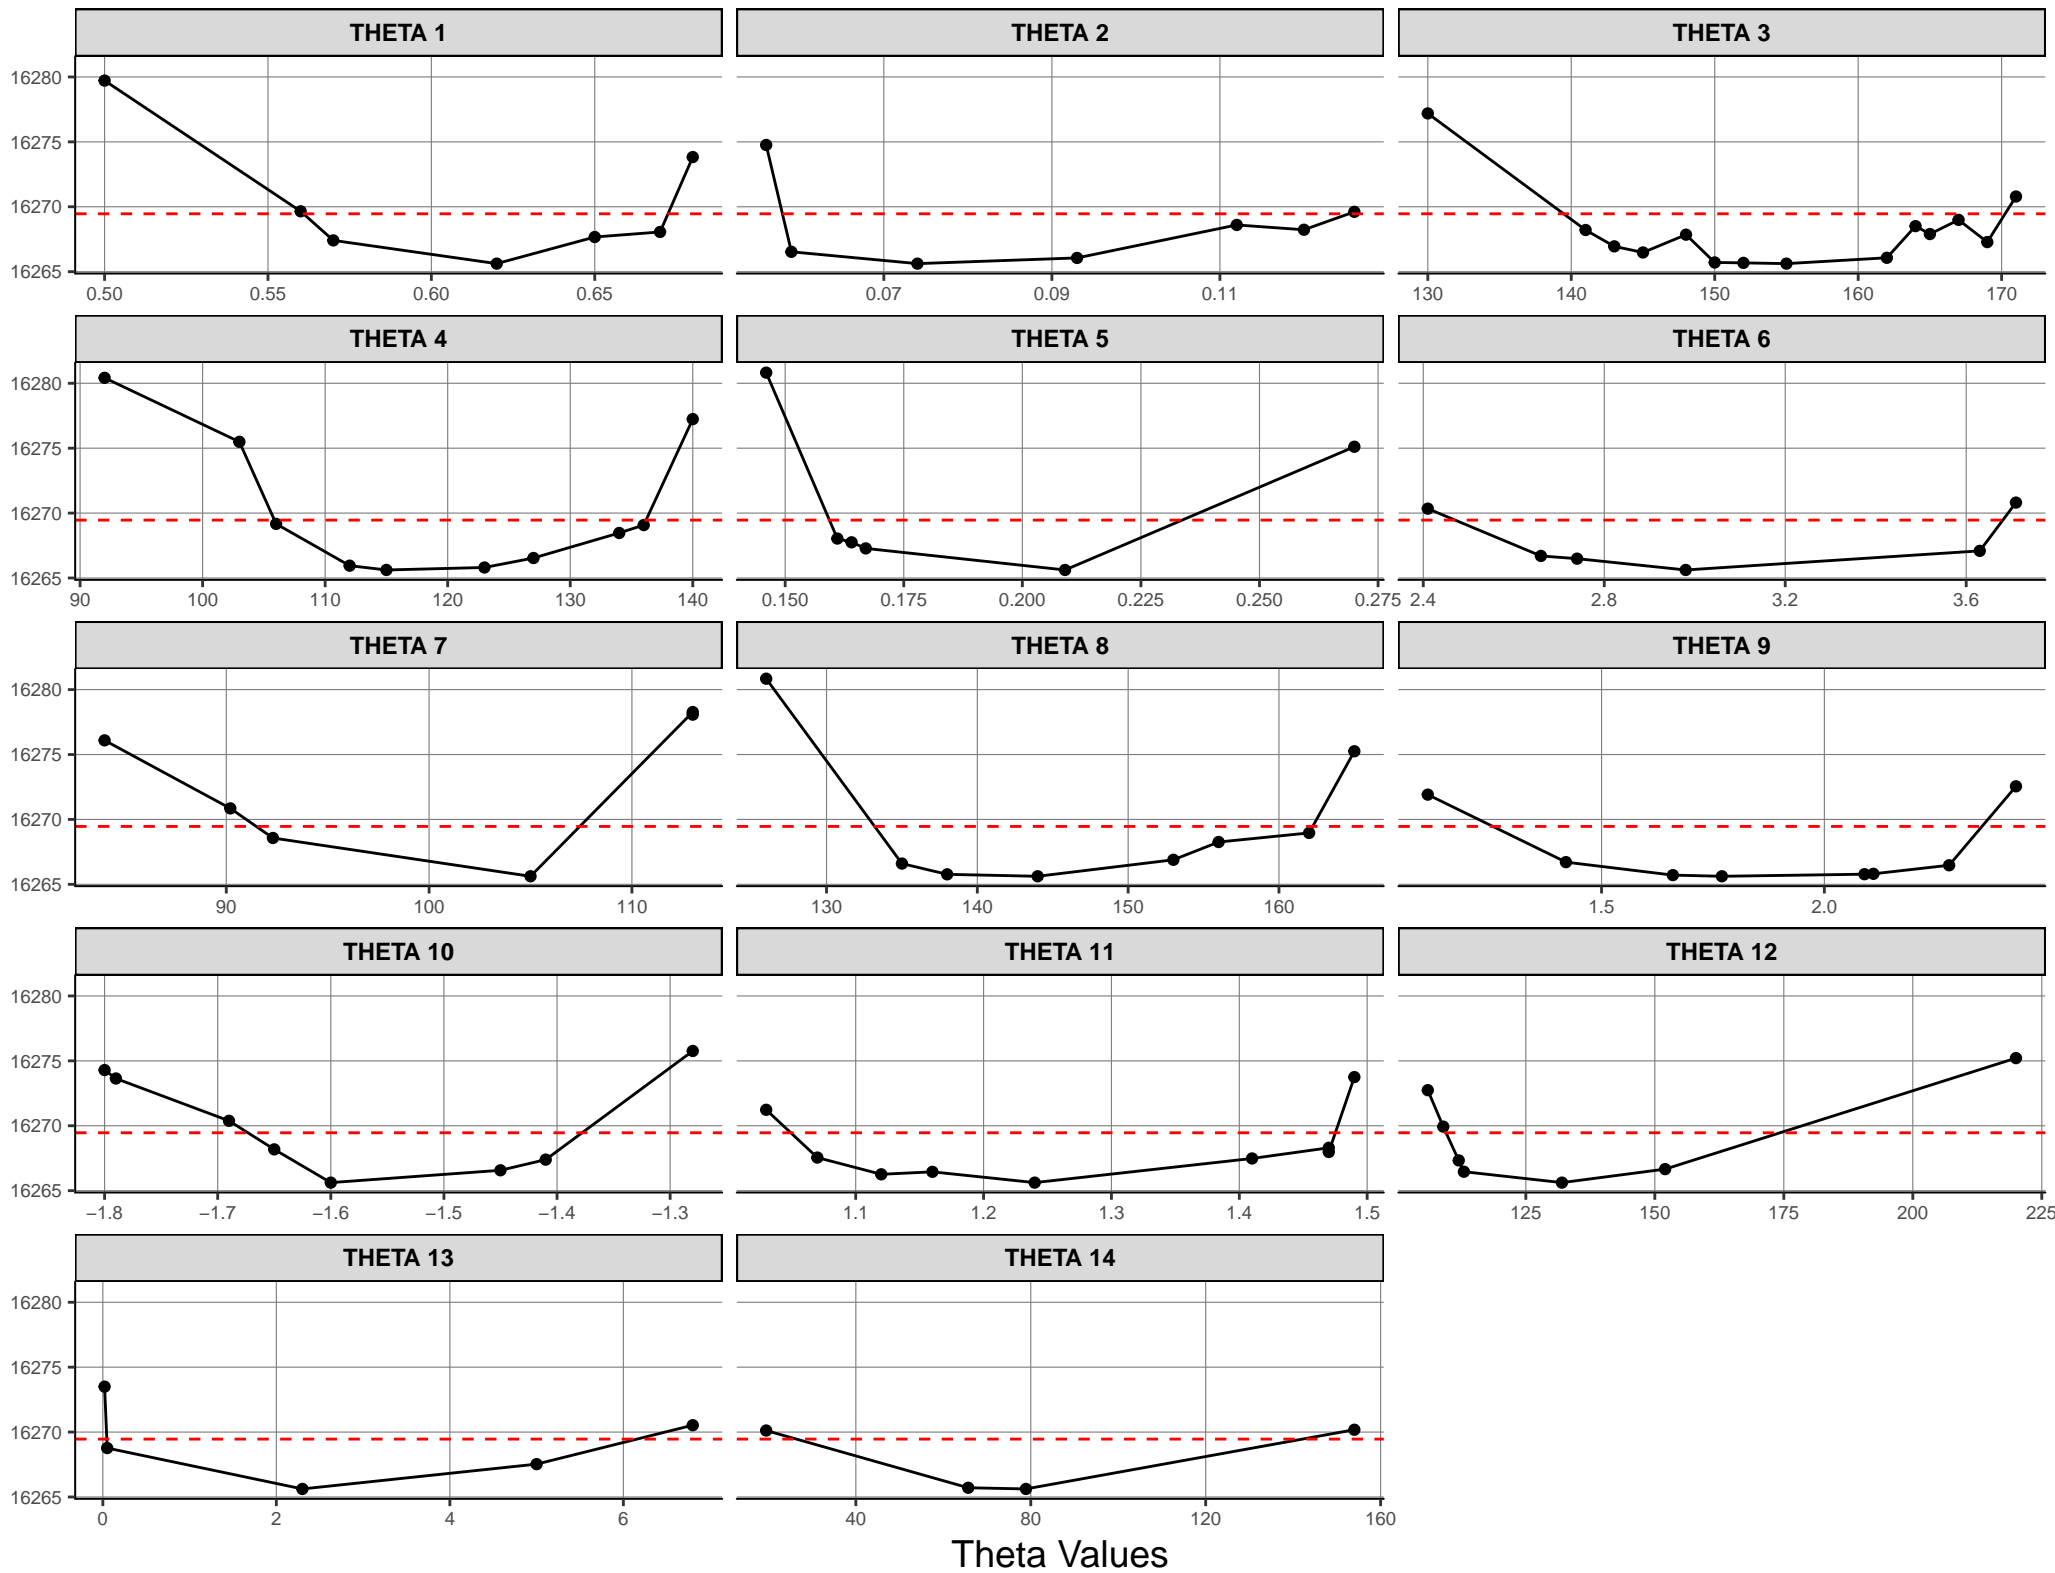

Supplement: mmc7.pdf [file mmc7.pdf]

# Linear

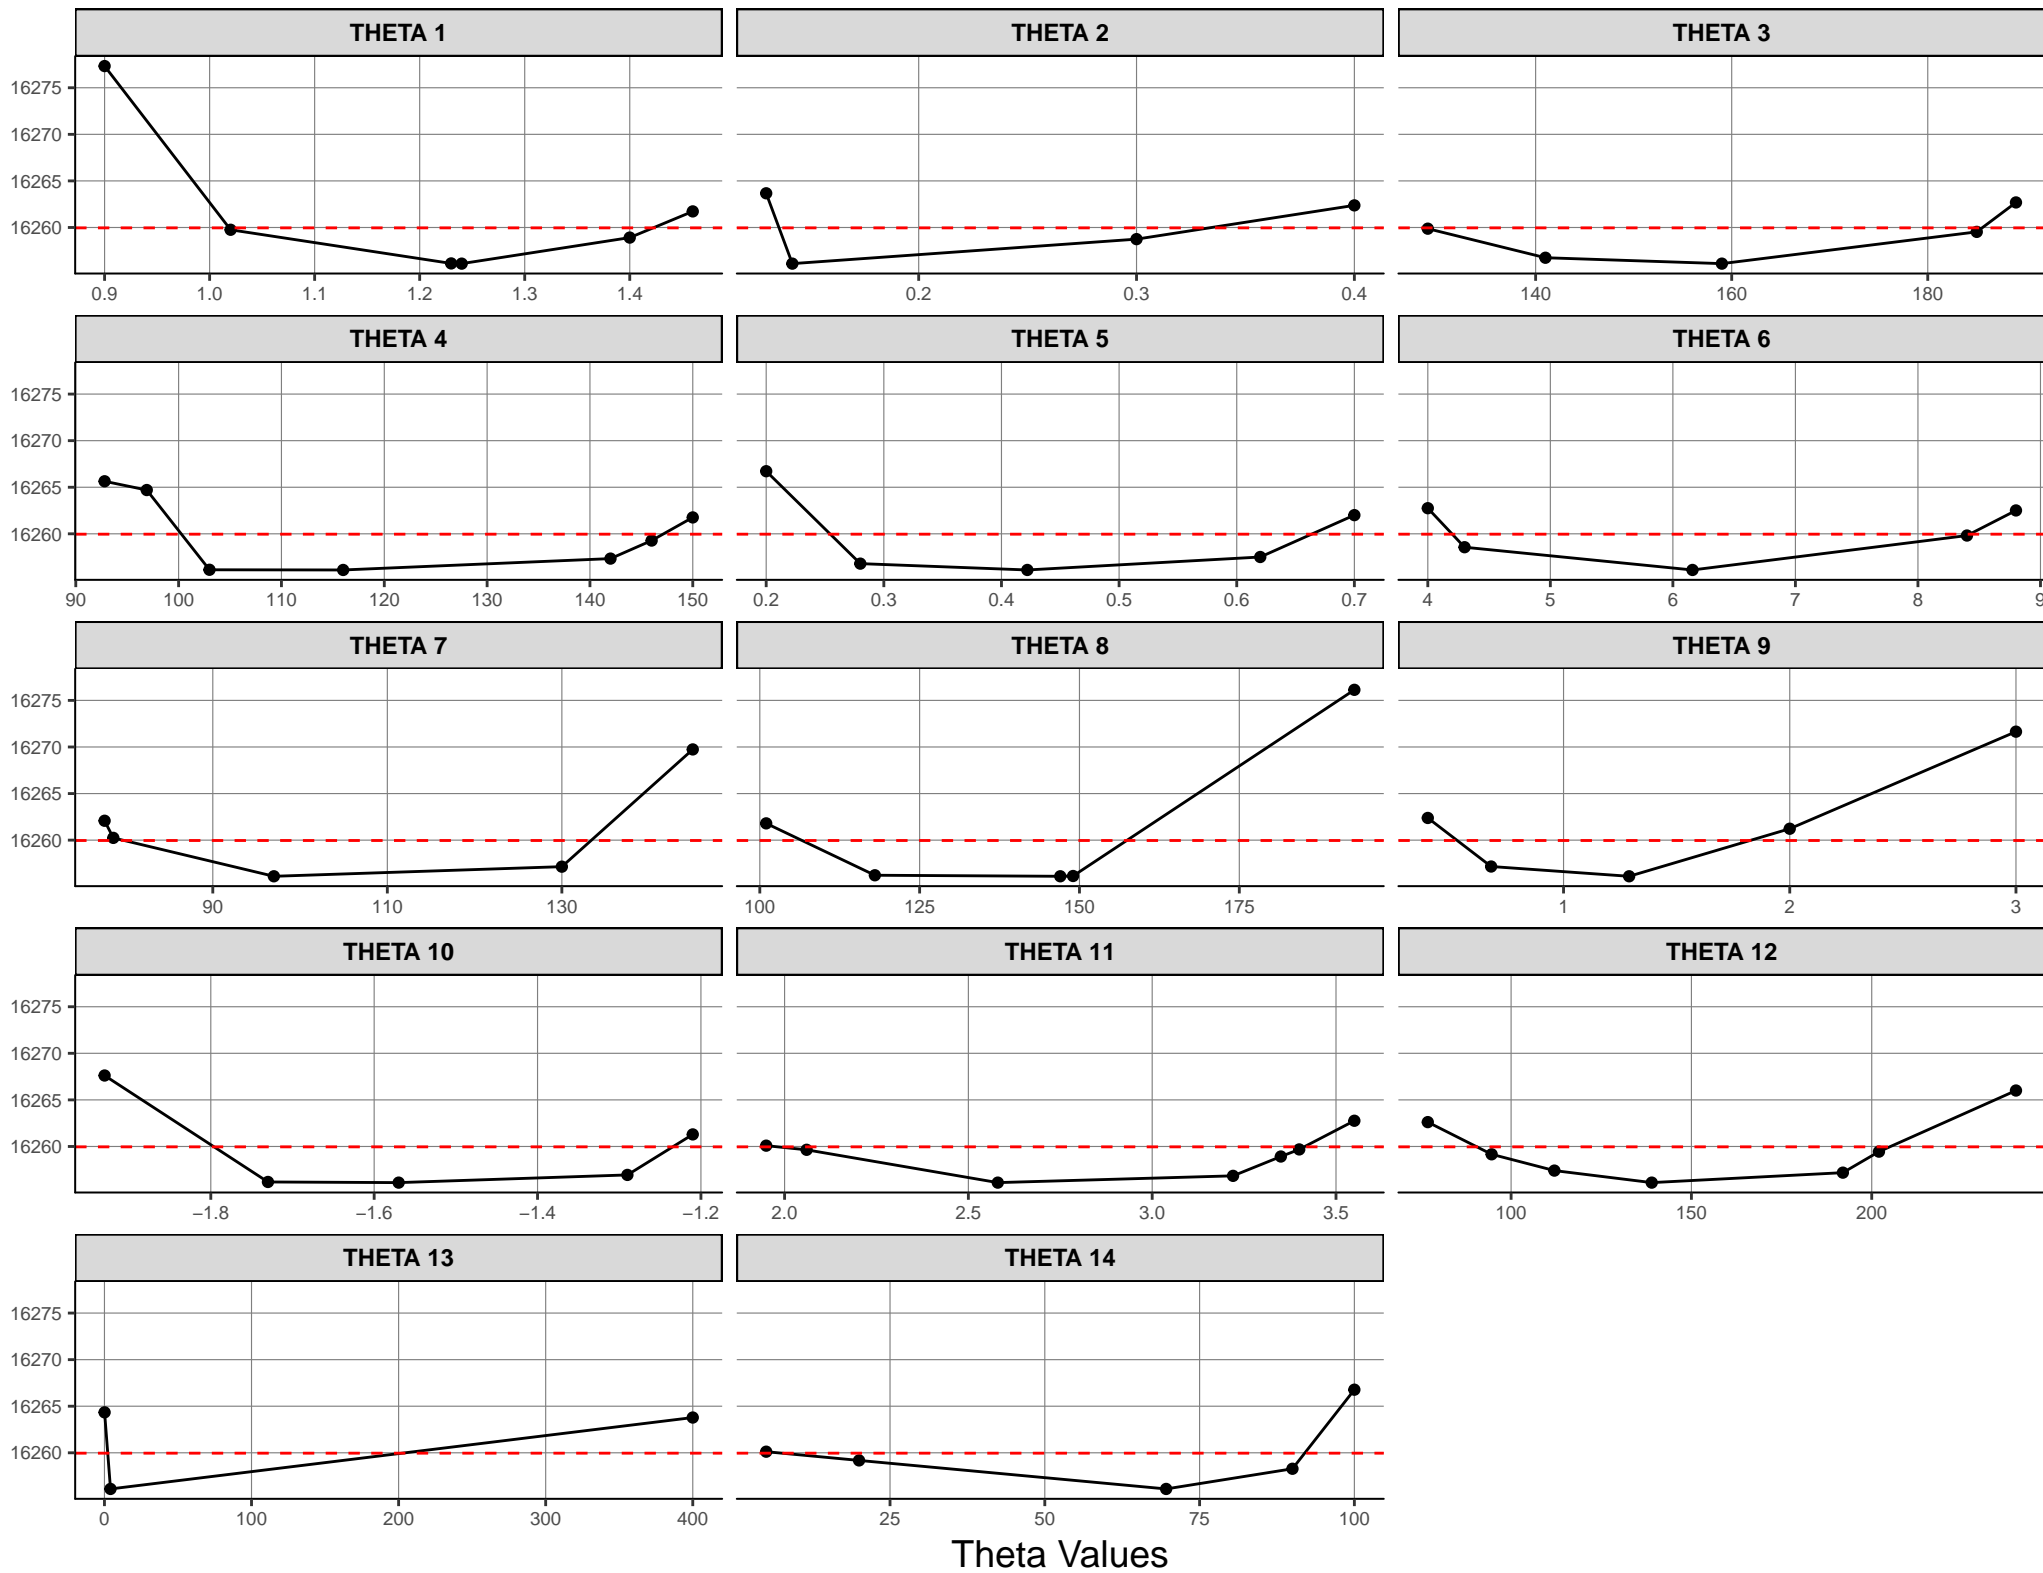

Supplement: mmc8.pdf [file mmc8.pdf]
